## Parallel and Population-specific Gene Regulatory Evolution in Cold-Adapted Fly Populations

Yuheng Huang<sup>1\*<sup>@</sup></sup>, Justin B. Lack<sup>1\*\*</sup>, Grant T. Hoppel<sup>1</sup>, and John E. Pool<sup>1<sup>@</sup></sup>

<sup>1</sup>Laboratory of Genetics, University of Wisconsin-Madison, Madison, Wisconsin 53706

\* Current address: Department of Ecology and Evolutionary Biology, University of California, Irvine, Irvine, CA 92697

\*\* Current address: Advanced Biomedical Computational Science, Frederick National Laboratory for Cancer Research, Frederick, MD 21701

<sup>@</sup>e-mail: yuhenh3@uci.edu; jpool@wisc.edu.

## 1 **Abstract**

2 Changes in gene regulation at multiple levels may comprise an important share of the molecular  
3 changes underlying adaptive evolution in nature. However, few studies have assayed within- and  
4 between-population variation in gene regulatory traits at a transcriptomic scale, and therefore  
5 inferences about the characteristics of adaptive regulatory changes have been elusive. Here, we  
6 assess quantitative trait differentiation in gene expression levels and alternative splicing (intron usage)  
7 between three closely-related pairs of natural populations of *Drosophila melanogaster* from  
8 contrasting thermal environments that reflect three separate instances of cold tolerance evolution.  
9 The cold-adapted populations were known to show population genetic evidence for parallel evolution  
10 at the SNP level, and here we find evidence for parallel expression evolution between them, with  
11 stronger parallelism at larval and adult stages than for pupae. We also implement a flexible method to  
12 estimate *cis*- versus *trans*-encoded contributions to expression or splicing differences at the adult  
13 stage. The apparent contributions of *cis*- versus *trans*-regulation to adaptive evolution vary  
14 substantially among population pairs. While two of three population pairs show a greater enrichment  
15 of *cis*-regulatory differences among adaptation candidates, *trans*-regulatory differences are more  
16 likely to be implicated in parallel expression changes between population pairs. Genes with  
17 significant *cis*-effects are enriched for signals of elevated genetic differentiation between cold- and  
18 warm-adapted populations, suggesting that they are potential targets of local adaptation. These  
19 findings expand our knowledge of adaptive gene regulatory evolution and our ability to make  
20 inferences about this important and widespread process.

21

## 22 **Introduction**

23 Different species or populations often evolve similar phenotypes when adapting to similar  
24 environments (Schluter 2000; Losos, 2011). Although such parallel phenotypic evolution can be  
25 caused by amino acid changes, there is increasing evidence that regulatory mutations altering gene  
26 expression underlie many cases of phenotypic evolution (Wittkopp & Kalay, 2012; Jones et al. 2012;  
27 Stern 2013; Sackton et al. 2019). Most studies on gene regulatory evolution focus on expression  
28 abundance (the number of transcripts for a whole gene). However, alternative splicing changes  
29 resulting in modified transcript proportions can also contribute to adaptation (Barbosa-Morais et al.  
30 2012; Gamazon and Stranger 2014; Smith et al. 2018), and yet splicing evolution has received far  
31 less study.

32

33 The level of parallelism for gene expression evolution varies across study systems. In some taxa and  
34 natural conditions, significantly more genes show parallel changes (repeatedly up- or down-regulated  
35 in one ecotype relative to the other among independent population pairs) than anti-directional  
36 changes (Zhao et al. 2015; Hart et al. 2018; Kitano et al. 2018; McGirr and Martin. 2018). However,  
37 some other cases did not show significant parallel patterns, or they even showed anti-parallel patterns  
38 (Derome et al. 2006; Lai et al. 2008; Hanson et al. 2017). The varying degree of parallelism may  
39 partly be explained by the level of divergence among ancestors: more closely related ancestors are  
40 expected to show a higher degree of parallel genetic evolution underlying similar phenotypic  
41 evolution (Conte et al. 2012; Rosenblum et al. 2014).

42

43 Furthermore, gene expression evolution can be caused by the same or different molecular  
44 underpinnings. Because of the difficulties of mapping expression quantitative trait loci (eQTLs), a  
45 first step is to classify the expression evolution into two regulatory classes. *Cis*-regulatory changes  
46 are caused by local regulatory mutations and result in allele-specific expression in a hybrid of  
47 divergent parental lines (Singer-Sam et al. 1992; Cowles et al. 2002; Yan et al. 2002; Wittkopp et al.  
48 2004). *Trans*-regulatory changes are caused by mutations at other loci. They modify the expression  
49 of both alleles in hybrid diploids and do not result in allele-specific expression (Yvert et al. 2003;  
50 Wittkopp et al. 2004; Wang *et al.* 2007). The relative importance of *cis*- and *trans*-effects to parallel  
51 evolution varies among different studies systems (Wittkopp et al. 2008; McManus et al. 2010;  
52 Wittkopp and Kalay 2012; Coolon et al. 2014; Lemmon et al. 2014; Nandamuri et al. 2018). Many  
53 previous studies have focused on regulatory evolution between relatively distantly related lineages  
54 such as different species, from which population genetic evidence of adaptive evolution may not be  
55 available. Some studies have investigated the *cis*- vs. *trans*-regulatory variation within or between  
56 recently diverged populations but are limited to one or two populations (Chen et al. 2015; Osada et al.  
57 2017; Glaser-Schmitt et al. 2018). To our knowledge, the only two cases comparing *cis*- and *trans*-  
58 regulatory changes for repeated adaptive divergence between populations are from threespine  
59 stickleback fish and they revealed contrasting patterns (Hart et al. 2018; Verta and Jones 2019).  
60 Hence, the relative contributions of *cis*- and *trans*-effects to recent parallel adaptation remain mostly  
61 unknown.

62

63 In part driven by interest in the evolutionary response to climate change, *Drosophila* has been used as  
64 a model system to study the genetic basis of thermal adaptation (Hoffmann et al. 2003). Because  
65 temperature is an important environmental variable along latitudinal clines, clinal populations of

66 *Drosophila melanogaster* have been studied for decades (Adrion et al. 2015). Along these clines,  
67 populations exhibit different degrees of cold tolerance in the expected direction, suggesting spatially  
68 varying selection related to temperature (Hoffmann and Weeks 2007; Schmidt and Paaby 2008). The  
69 recent development of genomics has allowed identification of clinal genomic variants, which are  
70 candidates for thermal adaptation (e.g., Kolaczkowski et al. 2011; Fabian et al. 2012; Bozicevic et al.  
71 2016; Mateo et al. 2018). There is also evidence of parallel evolution at the genomic and  
72 transcriptomic level (Reinhardt et al. 2014; Bergland et al. 2015; Machado et al. 2015; Zhao et al.  
73 2015; Juneja et al. 2016; Zhao and Begun 2017). Some of these studies compared clines between  
74 species (which may have somewhat distinct biology), while others compared clines between  
75 Australia and North America (which both feature primarily European ancestry with clinally variable  
76 African admixture). Other transcriptomic studies have identified genes showing differential  
77 expression between sub-Saharan African and European populations (e.g., Catalan et al. 2012;  
78 Huylmans and Parsch 2014), which are separated by moderately strong neutral genetic differentiation  
79 associated with the out-of-Africa bottleneck.

80

81 More broadly, populations of *D. melanogaster* from contrasting environments offer an excellent  
82 opportunity to study parallel gene regulatory evolution and its underlying mechanisms. Originating  
83 from a warm sub-Saharan ancestral range (Lachaise et al. 1988; Pool et al. 2012), *D. melanogaster*  
84 has occupied diverse habitats, including environments with contrasting temperature ranges. There are  
85 at least three instances in which the species expanded to cold environments: from Africa into higher  
86 latitude regions in Eurasia, from Ethiopia lowland to higher altitudes, and from South Africa lowland  
87 to higher altitudes. Populations were collected from these six regions, representing three warm-cold  
88 population pairs: Mediterranean pair (MED), collected in Egypt (EG, warm) and France (FR, cold);  
89 Ethiopian pair (ETH) collected in Ethiopia lowland (EA, warm) and highland (EF, cold); and South  
90 Africa pair (SAF), collected in South Africa lowland (SP, warm) and highland (SD, cold).

91 Importantly, each of these population pairs has the advantage of low genetic differentiation between  
92 its warm- and cold-adapted members compared to the differentiations among pairs (Pool et al. 2017).

93 Although the cold populations have invaded colder habitats for only ~1000-2000 years (~15k-30k  
94 generations) (Sprengelmeyer et al. 2020) and different habitats have distinct selective pressures  
95 besides cold (e.g., air pressure, ultraviolet radiation, food resources), the cold-dwelling populations  
96 have shown signals of parallel adaptation for cold tolerance and allele frequency changes (Pool et al.  
97 2017). In the present study, this unique system allows us to assess the degree of parallelism for  
98 transcriptomic changes underlying parallel adaptation to colder environments.

99

100 Because the selection environments can vary drastically across life stages of *Drosophila*, we may  
101 expect to see different patterns of local adaptation and parallelism in gene expression across stages.  
102 For *D. melanogaster*, the larvae are mostly located within fruit and their primary role is feeding. The  
103 pupae are located on or near the fruit and are immobile. The adults are mobile; their primary role is  
104 mating and reproduction (Powell, 1997; Sokolowski et al. 1986), and it is thought to be the primary  
105 overwintering stage in seasonally cold environments (Lzquierdo 1991). And a recent study using *D.*  
106 *melanogaster* populations across the globe found local adaptation to thermal environments at egg,  
107 larval and adult stages but not the pupal stage (Austin and Moehring 2019). Therefore, we may  
108 expect a different level of parallel gene expression evolution for thermal environments for the pupal  
109 stage.

110

111 Here, we generate RNA sequencing (RNA-seq) data for multiple outbred genotypes from each of the  
112 six population samples listed above, from larval, pupal, and adult stages. We estimate gene  
113 expression and alternative intron usage levels for each sample, then identify cases of unusually high  
114 quantitative trait differentiation between each pair of warm- and cold-adapted populations and  
115 compare their genomic locations across developmental stages. We find that genes with highly  
116 differentiated expression are enriched on the X chromosome in the adult stage relative to the larval  
117 stage. We find evidence for parallel evolution for expression for both the larval and the female adult  
118 stages, but less parallel signal for the pupal stage. We further tease out the *cis*- and *trans*-regulatory  
119 effect at the adult stage by sequencing the transcriptomes of the parental lines from different  
120 populations and their F1 offspring. Applying our resampling approach to study *cis*- and *trans*-  
121 regulatory effects, we find that the relative contributions of these effects to adaptive expression  
122 differentiation is quite variable across population pairs, with *trans*-effects showing greater  
123 parallelism. Finally, we observe enrichments of genes with high  $F_{ST}$  among those that showed *cis*-  
124 effects and identify several candidate genes with both *cis*-effects and high  $F_{ST}$ , as potential targets of  
125 local adaptation.

126

## 127 **Methods and Materials**

### 128 *Ecologically and phenotypically differentiated populations*

129 The three *Drosophila melanogaster* cold-warm population pairs used in this study, France-Egypt  
130 (MED), Ethiopia (ETH) and South Africa (SAF), were described in previous publications (Pool et al.

131 2012; Lack et al. 2015; Pool 2017). Previous study has shown that female adults from the cold  
132 populations (FR, EF and SD) were more likely to recover after 96 hours at 4°C than the respective  
133 warm populations (Pool et al. 2017). To extend these results, three inversion-free strains from each of  
134 the cold populations as well as an ancestral warm adapted population (ZI) were used to measure egg  
135 to adult viability at different temperatures. Viability was assayed at 15°C as the cold environment  
136 and 25°C as the warm control environment. 40 mated female flies were allowed to lay eggs in a half  
137 pint glass milk bottle with a standard medium at room temperature for 15 hours. Each strain occupied  
138 ~8 bottles. After the flies were removed and the numbers of eggs were counted, about half of the  
139 bottles were incubated at 25°C and the other half 15°C. The numbers of adult flies that emerged from  
140 each bottle were counted after 14 days and 42 days from warm and cold environments respectively.  
141 Viability for each strain was measured as the average emergence proportion among bottles, which is  
142 the number of emerged adults divided by the number of eggs. To determine significance, unpaired t-  
143 tests between strains from each cold population and those from the ZI population were performed for  
144 both temperature conditions.

145

#### 146 *RNA sample collection and sequencing*

147 Within each population of the three warm/cold pairs (six populations in total), we selected 16 strains  
148 and assigned them into eight crosses (Fig. 1). Before the crossing, all the strains had been inbred for  
149 eight generations. The criterion for choosing parental strains for a cross was based on minimal  
150 genomic regions of overlapping heterozygosity. Among the strains chosen within each population,  
151 we used similar criteria to select four strains to perform crosses between the warm and the respective  
152 cold populations. Two of the four strains were used as the maternal lines and the other two were used  
153 as paternal lines in the between-population crosses. One cross between SD and SP populations was  
154 lost. We also collected adult female samples from the parental inbred lines used in the between-  
155 population crosses. Inversion frequencies are known to differ between these populations (Pool et al.  
156 2017) and inversions have been associated with expression differences (Lavington & Kern 2017;  
157 Said et al. 2018). While inversions are not an explicit focus of our study, they may contribute to  
158 population expression differences. The inversion information for the strains used can be found in  
159 Table S1.

160

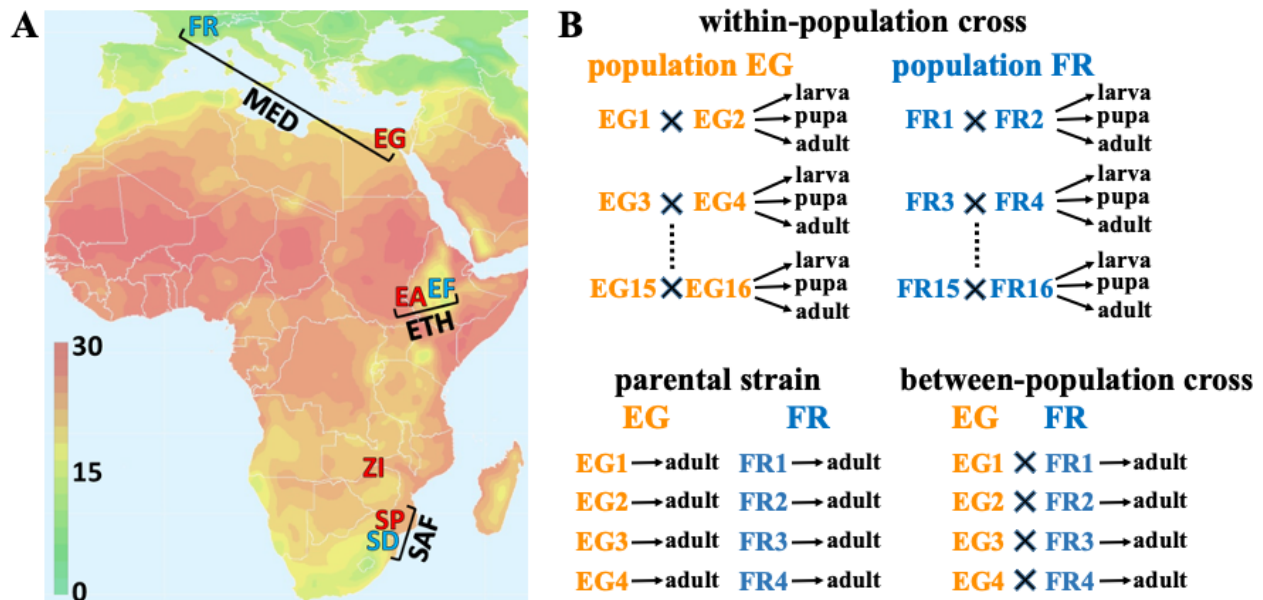

161  
162

163 Fig 1. Illustrations of the geographic origins of the three population pairs and the crossing design. (A)  
164 A map of average year-round temperature (°C) showing the geographic origins of each population  
165 sample studied, and their groupings into pairs of closely-related warm- and cold-derived population  
166 samples. The Mediterranean (MED) pair comprises a cold-derived France population (FR) and a  
167 warm-derived Egypt population (EG). The Ethiopian (ETH) pair comprises a cold-derived high-  
168 altitude population (EF) and a warm-derived low-altitude population (EA). Likewise, the South  
169 African (SAF) pair comprises a cold-derived high-altitude population (SD) and a warm-derived low-  
170 altitude population (SP). The location of an additional warm-derived population from Zambia (ZI),  
171 within the species' putative ancestral range, is also indicated. (B) Schematic figure showing the  
172 crossing design for one population pair (MED) as an example. Within-population crosses generated  
173 controlled outbred offspring for estimating  $P_{ST}$  to quantify population differentiation in gene  
174 expression; samples at three developmental stages (third instar larva, pupa and female adult) were  
175 collected from each cross. Parental inbred strains from warm- and cold-adapted populations and  
176 inter-population crosses between them were studied to estimate *cis*- and *trans*-regulatory effects that  
177 underlie the expression divergence; samples from female adults were collected.  
178

179 All the flies were reared at 15°C, which approximated the derived cold condition. 20 virgin females  
180 and 20 males were collected from maternal and paternal lines respectively for each cross and allowed  
181 to mate and lay eggs for a week in half-pint bottles. Each bottle contained standard *Drosophila*  
182 medium (containing molasses, cornmeal, yeast, agar, and antimicrobial agents). For the within-  
183 population crosses, samples at three developmental stages were collected: larva, pupa and female  
184 adult. Third-instar larvae were collected on the surface of the medium. For pupa, new yellow pupae  
185 were collected within one day of pupation. For adult, female flies were collected 4-5 days after  
186 eclosion. For samples from between-population crosses and parental lines, only female adults were  
187 collected. All the samples were shock-frozen in liquid nitrogen immediately after collection.

188

189 Approximate 50 larvae or 50 pupae or 30 female adults were used for RNA extraction for each  
190 sample. Total mRNA was extracted using the Magnetic mRNA Isolation Kit (New England Biolabs,  
191 Ipswich, MA) and RNeasy MinElute Cleanup Kit (Qiagen, Hilden, Germany). Strand-specific  
192 libraries were prepared using the NEBNext mRNA Library Prep Reagent Set for Illumina. Libraries  
193 were size-selected for approximately 150 bp inserts using AMPureXP beads (Beckman Coulter, CA,  
194 USA). The 179 libraries were quantified using Bioanalyzer and manually multiplexed for  
195 sequencing. All libraries were sequenced on a HiSeq2500 (V4) with 75bp paired-end reads in two  
196 flow cells. Numbers of paired-end reads generated for each library can be found in Table S2.

197

### 198 *Quantifying gene expression and exon usage frequency*

199 The paired-end sequence reads for the within-population cross samples were mapped to the  
200 transcribed regions annotated in the *D. melanogaster* reference genome (release 6, BDGP6.84) using  
201 STAR with parameters from ENCODE3's STAR-RSEM pipeline (Li and Dewey 2011; Dobin et al.  
202 2013). We note that cold- and warm-derived members of each population pair are expected to have  
203 very similar genome-wide reference sequence divergence (Lack et al. 2016a). For gene expression,  
204 the numbers of reads mapped to each gene were quantified using RSEM (Li and Dewey 2011). Reads  
205 mapped to the rRNA were excluded in the analysis. The expression abundance for each gene was  
206 standardized by the numbers of reads mapped to the total transcriptome of the sample.

207

208 To quantify exon usage, we used Leafcutter (Li et al. 2018) to estimate the excision frequencies of  
209 alternative introns. This phenotype summarizes different major splicing events, including skipped  
210 exons, and 5' and 3' alternative splice-site usage. Leafcutter took the alignment files generated by  
211 STAR as input to quantify the usage of each intron. Then Leafcutter formed clusters that contain all  
212 overlapping introns that shared a donor or accept splice site. The default parameters were used:  $\geq 50$   
213 reads supporting each intron cluster and  $\leq 500\text{kb}$  for introns length. The exon usage frequency is the  
214 number of intron excision events divided by the total events per cluster. It is worth noting that  
215 Leafcutter only detects exon-exon junction usage and it is unable to quantify 5' and 3' end usage and  
216 intron retention (Alasoo et al. 2019), which were not examined here.

217

### 218 *Principal component analysis*



219 To visually assess the overall patterns of variation in the transcriptomes among samples, we first  
220 performed principal component analysis (PCA) for the within population cross samples across three  
221 developmental stages using *DESeq2* (Love et al. 2014). The *DESeq* dataset object was constructed  
222 from the matrix of the count data outputted from *RSEM*. After the variance stabilizing transformation  
223 (vst), the top 5000 genes with highest variance across samples at the transformed scale were used for  
224 PCA. The principal component value for each sample was obtained by the function *plotPCA* (Fig.  
225 S2). We also performed principle component analysis for samples at each developmental stage. For  
226 the adult stage, we included the F1 offspring from crosses within populations, F1 offspring from  
227 crosses between populations and the inbred parental lines of the latter crosses.

228

### 229 *Identifying outliers in gene expression and intron usage differentiation using within-population* 230 *crosses*

231 To identify candidate genes under differential evolution between the warm and cold populations in  
232 each pair, we first controlled for the potential transcriptome skew caused by very highly expressed  
233 genes. For each expressed gene, we calculated the average expression of the cold samples  
234 ( $AvgExp_{cold}$ ) and that of the warm samples ( $AvgExp_{warm}$ ). Then we obtained the median of the ratio of  
235  $AvgExp_{cold}/AvgExp_{warm}$  across all expressed genes for the population pair. Gene expression for the  
236 warm samples was normalized by multiplying this median before subsequent analysis. This  
237 correction was designed to avoid a scenario in which either the cold population or the warm  
238 population had important expression changes in one or more highly expressed genes that caused the  
239 relative expression of all other genes to shift, even if their absolute expression level did not.

240

241 We used  $P_{ST}$  statistics to quantify gene expression divergence between cold and warm populations in  
242 each population pair using samples from within-population crosses:

$$P_{ST} = \frac{V_{between}}{V_{between} + 2V_{within}}$$

243 where  $V_{between}$  is between-populations variance for expression abundance and  $V_{within}$  is the average  
244 variance for expression abundance within populations. Although both within- and between-  
245 population components of variance can be confounded by the environmental variance,  $P_{ST}$  is still a  
246 useful statistic to quantify phenotypic differentiation (Lande 1992; Spitze 1993; Merila 1997;  
247 Brommer 2011; Leinonen et al. 2013). Here, environmental variance should be reduced by the  
248 common laboratory environment. To reduce sampling variance before calculating  $P_{ST}$ , for each gene,  
249 we required the total mapped reads across all 48 within-population samples to exceed 200 for a given

250 developmental stage. Then for each population/stage, we excluded the crosses/samples with the  
251 highest and lowest gene expression for each gene (to avoid high  $P_{ST}$  values being driven by single  
252 anomalous values), resulting in six samples per population/stage. The  $P_{ST}$  quantile based on data  
253 excluding extreme samples is concordant with the  $P_{ST}$  quantile calculated using all the crosses for  
254 most cases (Fig. S3).

255  
256 We chose the above  $P_{ST}$ -based approach instead of simply testing for differential expression in part  
257 because our within-population samples reflect real variation as opposed to technical replicates. Also,  
258 many alternative methods make assumptions about the data (e.g., negative binomial distribution for  
259 transcript counts) which are difficult to apply to splicing, even if they hold for expression.  $P_{ST}$  and  
260 the population genetic index  $F_{ST}$  are under the same theoretical framework, and are often directly  
261 compared to search for evidence of adaptive trait differentiation. However, environmental and  
262 measurement variance will downwardly bias  $P_{ST}$ , making targets of local adaptation less likely to  
263 reach a threshold defined by genome-wide high  $F_{ST}$  outliers. Hence, in this study we simply focus on  
264 the highest quantiles of  $P_{ST}$  for a given trait/population comparison, as detailed below.

265  
266 As with gene expression, we used  $P_{ST}$  to estimate the intron usage differentiation between cold and  
267 warm populations, with  $V_{between}$  as the between-population variance for a given intron's usage  
268 frequency,  $V_{within}$  as the average within-population variance for intron usage frequency. Before  
269 calculating  $P_{ST}$ , for each exon-exon junction, we averaged the intron excision events ( $n_i$ ) and the  
270 alternative events ( $n_j$ ) of the cluster across all samples in a developmental stage. The minimum for  
271 both types of event had to be at least 5 ( $n \in [n_i, n_j] \geq 5$ ). We also required that at least six samples  
272 have intron usage count  $> 0$  in each population for the exon-exon junction to be included in  
273 subsequent analysis. Then for each exon-exon junction, we excluded the sample with highest and  
274 lowest intron usage in a population/stage and calculated  $P_{ST}$ .

275  
276 *Examining the relative contribution of the X chromosome to population differentiation across*  
277 *stages*

278 For gene expression differentiation, we used the upper 5% quantile of  $P_{ST}$  as outlier cutoff to identify  
279 candidate genes potentially under geographically differential selection. Then we calculated the  
280 fraction of the outliers located on the X chromosome ( $f_x$ ). To generate the null distribution of  $f_x$ , we  
281 permuted the genes used in calculating  $P_{ST}$  and calculated  $f_x'$  for the top 5% of the permuted gene set.

282 This process was repeated 10,000 times to obtain a null distribution of  $f_x'$ . The upper 2.5% and lower  
283 97.5% quantile of  $f_x'$  define the 95% confidence interval. To test whether the actual  $f_x$  is significantly  
284 different from the null, the p-value is calculated as two times the proportion of the  $f_x'$  that were equal  
285 or more extreme than the actual  $f_x$  (two-tailed test).

286

287 To test whether the developmental stage impacts the enrichment of outliers on the X chromosome,  
288 we analyzed the fraction of genes on the X chromosome ( $f$ ) using linear model (*lm* function) in R  
289 (version 3.6.3):

$$290 \quad f_x = \text{Stage} + \text{Type} + \text{Stage} \times \text{Type} + \text{Pair}$$

291 where Stage is larvae/pupal/adult. Type is outliers or nonoutliers. Pair is the population pair. As we  
292 are interested in whether the difference in  $f$  between outliers and the background depends on the  
293 development stage, the model above was compared to a reduced model without the interaction term  
294 Stage  $\times$  Type using likelihood ratio test (*anova* function with test = "LRT"). If the Stage  $\times$  Type for  
295 the full dataset was significant, we performed the same analysis separately for larva-pupa, pupa-adult  
296 and larva-adult datasets to determine which stages caused the significant Stage  $\times$  Type effect.

297

#### 298 *Comparing $P_{ST}$ outliers with published data for African and European populations*

299 To study whether the adult fly in MED pair changes expression in similar ways as other African and  
300 European population comparisons, we first obtained lists of candidate genes showing significant  
301 differential expression between African and European populations for adult samples from Muller et  
302 al. 2011 ( $\text{padj} < 0.05$ ) and von Hackett et al. 2016. We calculated the numbers of  $P_{ST}$  outliers that are  
303 shared with the published lists with between-populations differential gene expression (in the same  
304 directions of expression changes). Then we permuted all the genes we tested in the MED pair and  
305 selected the same number of genes as the true outliers randomly. We asked how many genes in the  
306 randomly permuted list are shared with the published lists. We repeated the process 10,000 times to  
307 obtain a null distribution of the shared numbers. The p-value was calculated as the proportion of the  
308 null distribution that was equal or more than the actual number of shared genes (one-tailed test).

309 Another test was whether the shared genes for  $P_{ST}$  outliers were more likely to change expression co-  
310 directionally with the published lists than the non-outliers, which was tested by a Chi-square test.

311

#### 312 *Examining co-directional change for outliers shared between population pairs*

313 To study the degree of parallel evolution in gene expression, we identified outlier genes shared  
314 between two population pairs and showing consistent changes in the cold populations relative to the  
315 warm ones (co-directional). Whether the number of shared outliers with co-directional change was  
316 significantly different from expected by chance was determined by a permutation-based test. For the  
317 outlier genes in a certain pair, we calculated the number of these genes ( $N$ ) that were shared and  
318 changed expression in the same direction in the outliers from another pair. To generate the null  
319 distribution of  $N$ , we permuted the genes used in calculating  $P_{ST}$  and obtained a set of genes that pass  
320 a certain quantile in each pair. Then the  $N'$  was calculated based on the two permuted sets of outliers.  
321 This process was repeated 10,000 times to obtain a null distribution of  $N'$ . To determine the  
322 statistical significance, a p-value was calculated as two times the proportion of the  $N'$  that were equal  
323 or more extreme than the actual  $N$  (two-tailed test). The statistics here and those below assume the  
324 expression changes are independent among genes/introns, which is not always the case (genes can  
325 interact with each other via regulatory networks). We performed similar tests for pairwise  
326 comparisons between developmental stages for each population pair. The numbers for shared outliers  
327 with consistent changes between pairwise stages were reported in Table S8.

328

329 The second approach used to examine parallelism of gene expression evolution was to focus on the  
330 outlier genes for a specific population pair and examined whether the expression changes in another  
331 pair followed the same directions. If cold adaptation causes similar evolution in gene expression,  
332 those genes should tend to show changes in the same directions in both pairs. Each of the pairwise  
333 population combinations had two comparisons: the outliers can come from either pair. For the outlier  
334 genes in a certain pair, we calculated the fraction ( $F$ ) of these genes changing expression in the same  
335 direction in another pair. To generate the null distribution of  $F$ , we permuted the genes used in  
336 calculating  $P_{ST}$  and calculated  $F'$  for the permuted genes that pass a certain quantile. This process  
337 was repeated 10,000 times to obtain a null distribution of  $F'$ . The upper 2.5% and lower 97.5%  
338 quantile of the distribution define the 95% confidence interval. The p-value was calculated as two  
339 times the proportion of the  $F'$  that were equal or more extreme than the actual  $F$  (two-tailed test).

340

341 To identify intron usage outliers, a cutoff of the upper 5%  $P_{ST}$  was used. If multiple exon junctions  
342 had  $P_{ST}$  above the top 5% cutoff, only the exon junction with the highest  $P_{ST}$  would be kept as an  
343 outlier to control for nonindependence. Because the numbers of shared intron usage outliers in both  
344 population pairs are small (<10), we only performed the second type of analysis described above. For  
345 a certain developmental stage, we used the top 5% outlier intron usage in a particular pair and asked

346 what percentages of the intron usage changed co-directionally in another pair. To determine the  
347 statistical significance, we used the permutation approach as described above.

348

#### 349 *GO enrichment test for $P_{ST}$ outlier genes*

350 The Gene Ontology enrichment tests were performed using the R package “clusterProfiler” (Yu et al.  
351 2012) based on the fly genome annotation (Carlson 2018). The types of GO terms being tested  
352 contained all three sub-ontologies: Biological Process (BP), Cellular Component (CC) and Molecular  
353 Function (MF). Selection of overrepresented GO terms was based on adjusted p-value  $< 0.1$  using  
354 the “BH” method (Benjamini and Hochberg 1995) for each sub-ontology. This relaxed p-value  
355 threshold (after accounting for multiple testing) was used in light of the hypothesis-generating goals  
356 of this analysis. For gene expression, the upper 5%  $P_{ST}$  outliers were tested for GO enrichment  
357 relative to all the expressed genes for each population pair for a certain stage. To determine whether  
358 the shared significant GO terms between pairs were more than expected by chance, we randomly  
359 sampled the same numbers of genes as the outliers and performed the GO test for both pairs and  
360 identified the shared significant GO terms between pairs. We repeated the process 1000 times to get a  
361 set of numbers for the shared significant GO terms and compared to the actual number of shared  
362 significant GO terms to get a permuted p-value.

363

364 To access the functional categories of the differential intron usage, we calculated the quantile of  $P_{ST}$   
365 for each alternative intron’s usage. To rank the differentiation for a gene, we used the highest  
366 quantile (the most extreme differentiation) among the intron usages within the gene as the gene  
367 quantile ( $q_{gene}$ ). To account for the multiple testing of the intron usages for a gene, the adjusted total  
368 numbers of testing is calculated as  $n_{sum} = \sum_{i=1}^{i=j} (n_i - 1)$ , where  $n_i$  is the number of testing for a  
369 cluster and  $j$  is the number of clusters for the gene. Then, the adjusted gene quantile is  $q'_{gene} = 1 - (1 -$   
370  $q_{gene}) \times n_{sum}$ . The upper 5%  $q'_{gene}$  was used to identify the most differentiated genes for intron usage  
371 and they were tested for GO enrichment as described above.

372

#### 373 *Estimating cis- and trans-effects of regulatory divergence using between-population crosses and* 374 *parental strains*

375 To study the contributions of *cis*- and *trans*-regulatory effects on expression and intron usage  
376 divergence, we focused our analysis on the upper 5%  $P_{ST}$  outliers for gene expression/intron usage.  
377 For each gene/intron junction in each population pair, we selected a representative cross showing the

378 greatest difference between parental strains for this analysis. In addition, this difference needed to be  
379 larger than the average difference between the cold and warm populations from the outbred crosses  
380 for its pair.

381  
382 To study allele-specific expression/intron junction usage, we obtained the genomic sequences of the  
383 two parental strains aligned separately to the FlyBase *D. melanogaster* 5.77 assembly (Lack et al.  
384 2015; 2016a). The SNP calling from the reference genome was done by samtools (Li et al. 2009). To  
385 avoid mapping bias for the RNAseq reads (Degner et al. 2009; Stevenson et al. 2013), we updated  
386 the reference based on the SNPs for the two parental stains by masking the SNPs as “N”. The F1  
387 female adult RNA-seq reads were mapped to the updated reference using STAR with options: --  
388 chimFilter None --outFilterMultimapNmax 1 (Dobin et al. 2013). Because of the fairly high level of  
389 heterozygosity within our inbred lines (Lack et al. 2015), we attempted to use polymorphic sites to  
390 study the allele-specific expression instead of focusing on the fixed difference between parental  
391 strains. However, based on the simulations we performed (see supplementary document), our new  
392 method requires a large number of F1 offspring (>300 per cross) to reduce the random sampling of  
393 parental alleles. For this experiment (only 30 F1 offspring per cross), we therefore used SNPs that  
394 were fixed differences between the parental strains. SNPs were filtered with read counts  $\geq 10$  in the  
395 F1 RNA-seq sample and the parental samples. Then the allele frequency in the RNA reads for the F1  
396 sample was calculated to estimate allelic expression proportion. The allelic expression proportion for  
397 each candidate gene  $p_{FI}$  was the median average allele frequency for all sites located in the gene  
398 region.

399  
400 We tested two null hypotheses corresponding to *cis*-only and *trans*-only regulatory differences using  
401 a resampling approach. Under the null hypothesis that *cis*-regulatory effects are absent, the  $p_{FI}$  is  
402 expected to be near 0.5 because the cold parental strain contributes half of the alleles to F1 offspring,  
403 and alleles from different parents are expressed similarly in these F1s (Cowles et al. 2002; McManus  
404 2010; Meiklejohn et al. 2014). Under the null hypothesis that *trans*-regulatory effects are absent,  $p_{FI}$   
405 is expected to approximate the ratio of the cold parental strain expression to the total expression of  
406 both parental strains (Wittkopp et al. 2004):  $r_{F0} = E_c / (E_c + E_w)$ . However, sampling effects can cause  
407  $p_{FI}$  to deviate from the null expectations.

408  
409 We accounted for different types of uncertainty on estimating  $p_{FI}$ . To account for the measurement  
410 uncertainty in F1 expression, we sampled with replacement for the F1 reads mapped to each gene

411 until we reached the numbers of reads mapped to the gene. Then we recalculated the  $p_{FI}'$  for each  
412 SNP and then averaged across sites for each gene. We repeated the above process 1000 times to get a  
413 distribution of  $p_{FI}'$ . A 95% confidence interval of the distribution not overlapping with 0.5 suggested  
414 the existence of a *cis*-effect.

415  
416 To test for a *trans*-effect, the uncertainty when estimating the expression level in parental strains also  
417 needs to be accounted for. For each gene/intron in a parental strain, we used binomial sampling based  
418 on the expression level of the gene/intron. The sampling probability is the proportion of reads for that  
419 gene/intron relative to total reads in a sample and the number of sampling events equals the total  
420 reads of the sample. Then we had the updated expression for the cold strain  $E_c'$  and the warm strain  
421  $E_w'$ . The updated  $r_{FO}'$  is calculated as  $E_c'/(E_c' + E_w')$ . The sampling and calculation were repeated  
422 1000 times. Each time the  $r_{FO}'$  was paired with a  $p_{FI}'$  described above to calculate the difference  $D' =$   
423  $r_{FO}' - p_{FI}'$ . A 95% confidence interval of  $D'$  not overlapping with 0 suggested the existence of a  
424 *trans*-effect.

425  
426 To test the specificity and sensitivity of this approach, we performed simulations to generate  
427 expression read data and apply our method on the simulated data (supplementary document). We  
428 found that our approach has good performance under reasonable conditions and can be adapted for  
429 other traits, such as splicing. For splicing, the  $p_{FI}$  is the allele frequency for the diagnostic SNPs  
430 located in the exon-junction and the  $r_{FO}$  is the ratio of the cold parental strain intron usage frequency  
431 to the sum of the frequencies for both parental strains.

432  
433 Based on the tests above, the set of candidate genes were classified into categories including no  
434 significant *cis*- or *trans*-effect, *cis* only, and *trans* only (McManus 2010; Schaefer et al. 2013; Chen  
435 et al. 2015). For genes showing both *cis*- and *trans*-effects, we further classified them based on  
436 whether these two effects favored expression of the same (co-directional) or different parental allele  
437 (anti-directional). For exon usage differentiation, we applied a similar approach to classify the  
438 differentiated exons into the five categories, accounting for different sampling effects and  
439 measurement errors. Instead of analyzing expression level of the parental strains ( $E$ ), we analyzed  
440 their intron usage frequency for the sets of outlier intron junctions.

441  
442 *Examining gene expression co-regulation among outliers for adult*

443 To study the level of co-regulation among outliers related to cold adaptation, we focused on the  
444 expressions of the outliers in the cold-derived populations. For each pairwise combination of two  
445 outliers, we calculated the correlation coefficient of the expression values among the eight outbred  
446 samples. To test whether the correlation coefficient is different from random expectation, we  
447 permuted the eight outbred samples randomly for one gene for each gene combination, requiring at  
448 least five of the eight samples to be changed. Then we calculated the correlation coefficient between  
449 genes with the permuted samples. We repeated the process 10,000 times to obtain a null distribution  
450 of the correlation coefficient. The p-value was calculated as the proportion of the null distribution  
451 that was equal or more than the actual coefficient (one-tailed test). We used  $p < 0.05$  as a cutoff to  
452 identify significantly co-regulated outlier pairs. To compare the level of co-regulation between  
453 populations, we calculated the proportion of co-regulated pairs were significantly co-regulated for  
454 each population as well as the number of significant co-regulated partners for each gene in each  
455 population.

456

#### 457 *Examining between-population genetic differentiation for genes with cis-effect*

458 For the  $P_{ST}$  outliers identified with significant *cis*-effects, we hypothesized that causative *cis*-  
459 regulatory elements may show elevated allele frequency differentiation between the warm and cold  
460 populations. For expression abundance, the majority of *cis*-regulatory SNPs are located within 2kb  
461 upstream of the transcription start site and downstream of the transcription end site (Massouras et al.  
462 2012). Therefore, we used the interval from 2kb upstream to 2kb downstream as the focal region of a  
463 gene for this analysis. We calculated window  $F_{ST}$  and SNP  $F_{ST}$  using sequenced genomes from  
464 *Drosophila* Genome Nexus (Lack et al. 2015 & 2016a). For window  $F_{ST}$ , the division of windows  
465 within a gene region was based on 250 non-singleton variable sites per window in the ZI population  
466 (Pool et al. 2017). Each window needed to have at least five genotypes for each population. Before  
467 assigning window  $F_{ST}$  to the focal genes, we confirmed that there is no large chromosomal scale of  
468 differentiation between populations for each pair (Fig. S8). The highest  $F_{ST}$  for the windows  
469 overlapping the focal region was assigned as its  $F_{ST\_winmax}$ . To determinate the statistical significance  
470 of  $F_{ST\_winmax}$ , we calculated  $F_{ST\_winmax}$  for all other blocks of the same number of windows (to account  
471 for gene length) along the same chromosome arm where cross-over rates were above 0.5cM/Mb  
472 (Comeron et al. 2012), but excluding those within 10 windows of the focal region. The specific non-  
473 low recombination regions are: 2.3–21.4 Mb for the X chromosome, 0.5–17.5 Mb for arm 2L, 5.2–  
474 20.8 Mb for arm 2R, 0.6–17.7 Mb for arm 3L, and 6.9–26.6 Mb for arm 3R. SNP  $F_{ST}$  was  
475 calculated for sites with at least 10 alleles for each population. The highest value ( $F_{ST\_SNPmax}$ ) within



476 the focal region was thus obtained for the focal gene. Analogous to our  $F_{ST\_winmax}$  permutation, we  
477 also calculated  $F_{ST\_SNPmax}$  for permuted regions with the same number of SNPs as the focal region,  
478 along the non-low cross-over rate region on the same chromosome arm. For both  $F_{ST\_winmax}$  and  
479  $F_{ST\_SNPmax}$ , we then focused on regions in the upper 5% quantile of permuted values for further  
480 analysis. To test whether the expression outliers with cis-effects are enriched for high  $F_{ST}$  outliers, we  
481 analyzed the fraction of  $F_{ST}$  outliers ( $f$ ) using a linear model (lm) in R:

$$482 \quad f = \text{Type} + \text{Pair}$$

483 where Type is outliers with *cis*-effect (*cis*-outlier) or non-outliers, and Pair is the population pair. The  
484 model above was compared to a reduced model without the Type term using likelihood ratio test  
485 (anova function with test = “LRT”). For outlier genes that showed a *cis*-effect and high  $F_{ST}$ , location  
486 and functional information were obtained from Flybase (Thurmond et al. 2019).

487

488

## 489 **Results**

### 490 *Gene expression differentiations between warm- and cold-derived populations*

491 In a cold environment (15°C), we found the FR and EF populations have significantly higher egg-to-  
492 adult viability than an ancestral range population and the SD population follows the same trend (Fig.  
493 S1, Table S3). In contrast, at a 25°C benign temperature all of the populations have relatively high  
494 survival (75%). These findings were consistent with past results (Pool et al. 2017) in suggesting that  
495 the cold-derived populations have adapted to low temperature.

496

497 We then surveyed the transcriptomes of larvae, pupae, and female adults for multiple genotypes from  
498 each cold- and warm-adapted population using high-throughput RNA sequencing (RNA-Seq). To  
499 focus on the transcriptomes of outbred genotypes, we generated eight within-population crosses from  
500 each population under the derived cold environment (15 °C). We pursued this outbred strategy to  
501 guard against inbreeding effects amplifying within-population regulatory variation and therefore  
502 dampening estimates of regulatory differentiation between populations (estimated using the  
503 quantitative genetic index  $P_{ST}$ ). Comparing our inbred adult RNA-Seq data against outbred data from  
504 a subset of the same strains, we found results that were mostly consistent with that expectation: five  
505 out of six populations showed greater expression variance in inbred than outbred data, and two out of  
506 three population pairs showed higher  $P_{ST}$  values from outbred than inbred data (Table S6). We  
507 therefore focused on outbred data for subsequent population comparisons.

508

509 After performing PCA on normalized expression values, we found that the first and second principle  
510 component of gene expression showed clear signals of developmental stages among samples, while  
511 signals of transcriptome-wide population differentiation was more modest (Fig. S2). We then used  
512  $P_{ST}$  to quantify phenotypic differentiation of expression and splicing between populations in each  
513 pair.  $P_{ST}$ , analogous to  $F_{ST}$  for genetic variation, measures the amount of trait variance between  
514 populations versus total variance for a phenotype (Merila 1997; Brommer 2011; Leinonen et al.  
515 2013). The genes/intron usages with highest  $P_{ST}$  quantiles are more likely to be under ecological  
516 differential selection between populations than those with lower  $P_{ST}$  quantiles (Leder et al. 2015).  
517

518 Genes were filtered for analysis based on  $\geq 200$  counts across all 48 within-population samples (8  
519 samples per population, six populations in total for three pairs). The numbers of genes that passed the  
520 filters for analysis were: 4699 genes for larva, 5098 genes for pupa and 6785 genes for adult. We  
521 initially observed that in the ETH pair, the adult sample showed a general shift in transcriptome-wide  
522 relative abundances between populations, caused by a few highly expressed genes (Fig. S4). Further  
523 investigation suggested that the EF population was primarily responsible for the observed ETH  
524 asymmetries in adults (Fig. S5). Many of the highly expressed genes in the cold-adapted and larger-  
525 bodied EF population (Lack et al. 2016b) are related to muscle protein (Table S4). To correct for the  
526 influence of such changes on relative expression levels, we standardized the expression values of  
527 warm-derived populations by the median expression ratio between cold- and warm-derived  
528 populations, resulting in about the same numbers of genes with increased and decreased expression  
529 in the cold-derived population relative to the warm-derived one transcriptome-wide (Fig. S4). To  
530 study gene expression divergence potentially under ecologically differential selection, we calculated  
531  $P_{ST}$  (Materials and Methods). The  $P_{ST}$  values for all genes for each population/stage are listed in  
532 Table S4. We used the upper 5% quantile of  $P_{ST}$  as outliers for each population pair. For the outliers,  
533 there is a strong directionality on the expression difference between populations for the ETH pair  
534 (Fig. 2): a large majority of ETH  $P_{ST}$  outliers had higher expression in the cold-adapted EF  
535 population in larvae and especially adults, with pupae showing a reversed pattern. These asymmetries  
536 mirrored transcriptome-wide skews in expression proportion for this population pair, in that  
537 substantially more genes had higher EF expression than the modal proportion (Fig S4). These  
538 observations suggest unique regulatory features for the populations in the ETH pair, perhaps hinting  
539 that many outlier genes might be co-regulated.

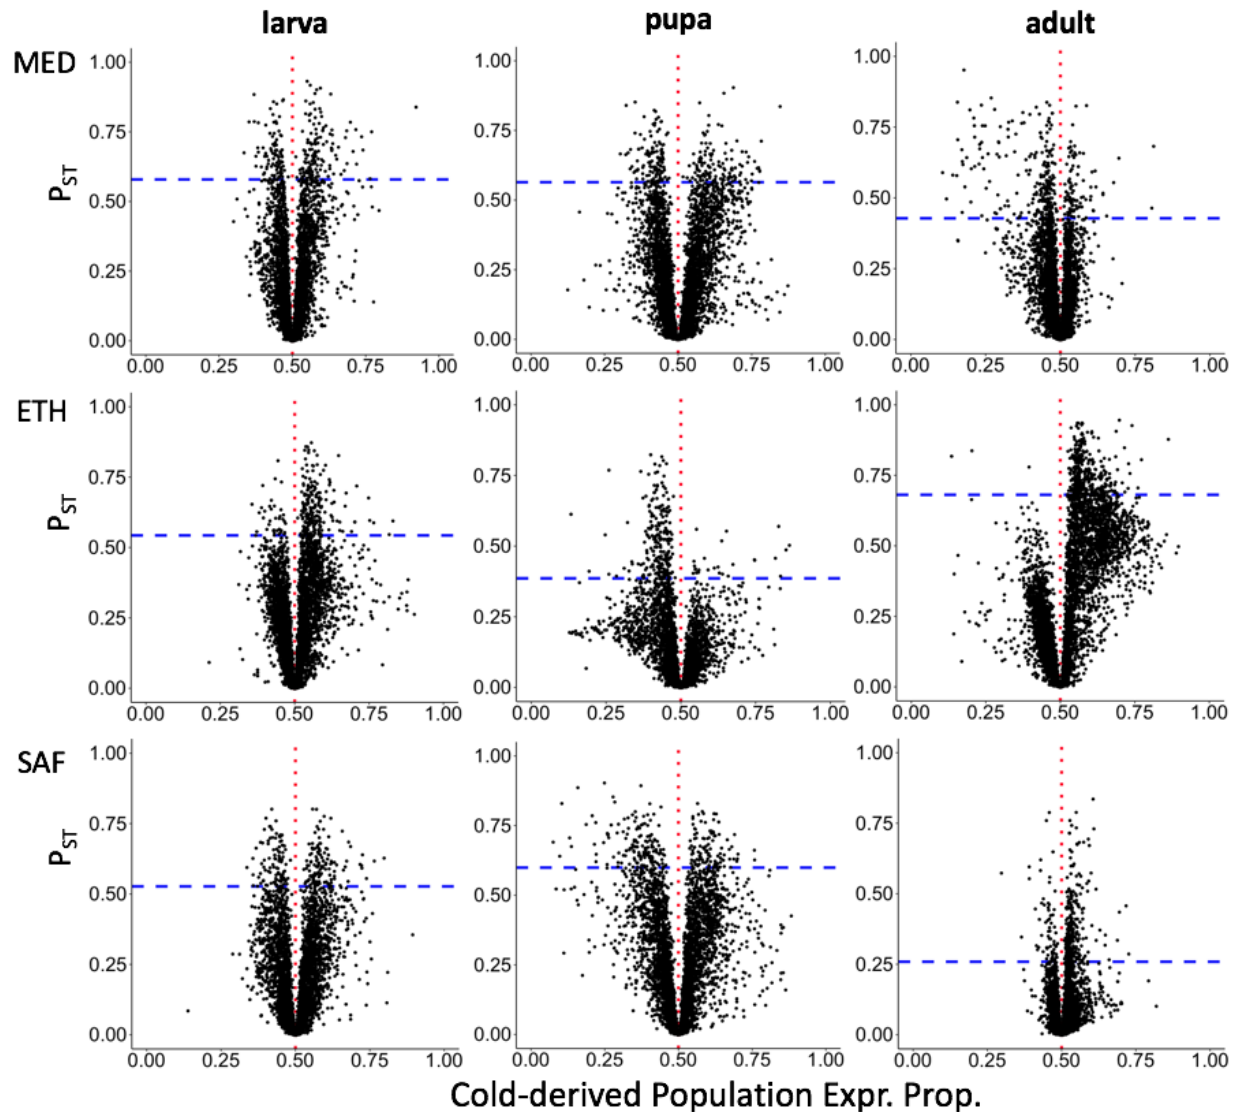

540  
541  
542  
543  
544  
545  
546  
547  
548

Figure 2. The relationship between expression differences between populations and  $P_{ST}$  illustrates asymmetric expression differences in some population pairs / developmental stages. The x-axis is the cold-derived population expression proportion, which is the ratio of mean expression of the cold-derived population relative to the sum of mean expression values from the two populations. Proportion higher than 0.5 (red vertical dashed lines) indicate a higher expression for the cold-derived population and the warm-derived one. The blue horizontal dashed lines show the upper 5% quantile of  $P_{ST}$ .

549

#### 550 *Comparing $P_{ST}$ outliers with published studies*

551 Since there are studies comparing whole-body transcriptomes between African and European  
552 populations in this species (Muller et al. 2011; von Heckel et al. 2016), we examined whether our  $P_{ST}$   
553 outliers for adults from the MED pair overlapped with the candidates showing differential expression  
554 between African and European populations from the published datasets. While each of these analyses

555 might detect regulatory evolution that occurred in Europe, we emphasize the distinctness of these  
556 geographic comparisons, since our Egypt sample differs substantially from the Zimbabwe population  
557 featured in those studies. For upper 5% quantile of  $P_{ST}$  outliers, we do not see more sharing with the  
558 previous candidates from either study than random expectations (permutation test,  $p = 0.47$  for  
559 comparing with Muller et al. 2011 and  $p = 0.39$  for comparing with von Heckel et al. 2016).  
560 However, for the upper 10% of  $P_{ST}$ , the outliers of MED are more likely to be shared with the  
561 candidates from Muller et al. 2011 than random expectations (permutation test,  $p = 0.0033$ ) but not  
562 with those from von Heckel et al. 2016 (permutation test,  $p = 0.47$ ). Moreover, among all the shared  
563 genes, our outliers were more likely to show gene expression change in the same directions as the  
564 previous candidates than the non-outliers ( $\chi^2 = 6.3$ ,  $df = 1$ ,  $p = 0.012$  for comparing with Muller et al.  
565 2011,  $\chi^2 = 7.4$ ,  $df = 1$ ,  $p = 0.0065$  for comparing with von Heckel et al. 2016).

566

### 567 *X chromosomal and autosomal contributions to regulatory evolution*

568 To investigate the contribution of autosomes versus the X chromosome to the expression  
569 differentiation due to cold adaptation, we surveyed the locations of  $P_{ST}$  outliers for different  
570 developmental stages (Fig. 3). At the larval stage, the proportions of  $P_{ST}$  outliers located on the X  
571 chromosome were lower than the genome-wide level in each population pair (permutation test,  $p =$   
572  $0.72$  for MED;  $p = 0.0076$  for ETH;  $p = 0.021$  for SAF). In contrast, at the adult (female) stage, the  
573 proportions of outliers located on the X tended to be higher than the background level (permutation  
574 test,  $p = 0.30$  for MED;  $p = 0.013$  for ETH and  $p = 0.89$  for SAF). For pupa, the X chromosome  
575 enrichment was not significantly different between outliers and the background. Considering the  
576 three population pairs together, the relative enrichments of outliers on the X chromosome were  
577 significantly different among developmental stages (likelihood ratio test,  $p = 0.048$ ). The patterns of  
578 different enrichment among stages were caused by larva/adult differences (likelihood ratio test,  $p =$   
579  $0.0058$  for larva-adult;  $p = 0.25$  for pupa-adult;  $p = 0.24$  for larva-pupa). The larva/adult difference  
580 might suggest either (1) a greater abundance of genes affecting adult fitness on the X chromosome,  
581 as previously suggested (Gibson et al. 2001; Innocenti and Morrow 2010), (2) a greater influence of  
582 female fitness on X chromosome evolution (e.g. Vicoso & Charlesworth 2006), in light of sex  
583 differences between our adult (female) and larval (mixed sex) samples, or (3) differences in the  
584 contributions of local adaptation and genetic drift to outlier sets at different stages, in combination  
585 with differential effects of drift between the X chromosome and autosomes (e.g. Pool & Nielsen  
586 2007).

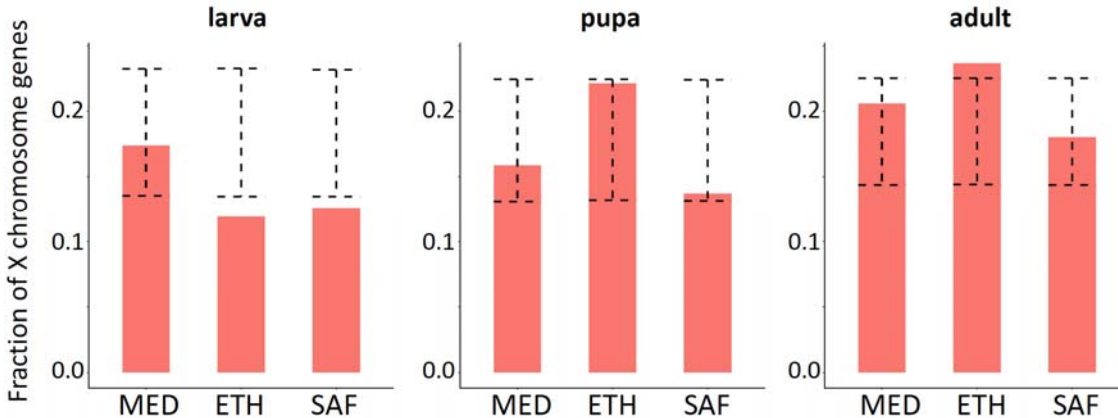

587

588 Fig 3. The fraction of  $P_{ST}$  outliers located on the X chromosome varies between developmental stages.  
589 The dashed error bar indicates the 95% confidence interval for the permuted data. If the real data  
590 (orange bar) is outside the range of the error bar, it indicates the fraction is significantly different  
591 from the genomic background ( $p < 0.05$ ).  
592

592

### 593 *Co-directional evolution in gene expression between population pairs*

594 Among the upper 5% of  $P_{ST}$  outliers, we found at least some significant signals of parallel expression  
595 divergence in all three pairwise comparisons (MED vs. ETH; MED vs. SAF; ETH vs. SAF), where  
596 the shared outliers with co-directional changes (i.e., expression difference between cold- and warm-  
597 derived populations in the same direction for both pairs) were more abundant than expected by  
598 random permutation (Table 1; Fig 4A). Averaged across three pairwise comparisons, 6.7% of the  
599 outliers were shared and changed consistently for the adult stage while 4.7% of outliers were co-  
600 directional for larva and only 2.6% were co-directional for pupa (for which one population pair  
601 comparison for pupa showed significant anti-directional changes). Changing the  $P_{ST}$  outlier cutoffs to  
602 2.5% or 10% produced qualitatively similar patterns (Table S7). We found one shared outlier with  
603 co-directional changes among all three pairs for the adult stage: *Iml1*, a regulator of cell size,  
604 starvation response, TOR signalling, and meiosis initiation (Bar-Peled et al. 2013; Wei et al. 2014).  
605 No three-pair shared outliers were found for the larva and pupa stages. One shared outlier among  
606 three pairs is not significantly more than the expectation by permutation. Still, it is worth noting that  
607 changing the  $P_{ST}$  outlier cutoff to 10% results in 12 shared outliers with co-directional changes  
608 among three pairs (permutation test,  $p < 0.0001$ ), which suggests that meaningful regulatory  
609 evolution may extend beyond our defined outliers. The names,  $P_{ST}$  values and quantiles of these 12  
610 genes are shown in Table 2. Of these genes, we note the role of *CrebB* in circadian behavior, which  
611 is known to differ between *D. melanogaster* populations from different thermal environments (Svetec  
612 et al. 2015; Cao & Edery 2017; Helfrich-Förster et al. 2018). Overall, these analyses suggest that the  
613 adult stage has the highest level of parallel evolution while pupa has the lowest.

614

| stage            | larva                 |                | pupa                  |                | adult                 |                        |
|------------------|-----------------------|----------------|-----------------------|----------------|-----------------------|------------------------|
| Population pairs | MED                   | SAF            | MED                   | SAF            | MED                   | SAF                    |
| ETH              | 3.4%<br>(3.0%)        | 3.0%<br>(3.4%) | <b>5.5%</b><br>(2.7%) | 2.0%<br>(2.0%) | 3.0%<br>(2.4%)        | <b>10.1%</b><br>(2.9%) |
| SAF              | <b>7.7%</b><br>(3.0%) |                | <b>0.4%</b><br>(2.0%) |                | <b>5.3%</b><br>(2.4%) |                        |

615 Table 1. Evidence for parallel expression evolution between population pairs. The percentages of  $P_{ST}$   
616 outlier with parallel expression abundance changes are shown. The random expectation is the median  
617 of the permuted proportions (in brackets). The majority of proportions were higher than the  
618 expectation, with larvae and adult stages showing stronger patterns than the pupa. Those that were  
619 significantly different from the random expectation are in bold (permutation test,  $p < 0.01$ ). We  
620 found one case, the MED-SAF comparison at pupal stage, that showed a significantly lower level of  
621 parallel evolution than the random expectation. Further detail regarding the numbers of shared and  
622 non-shared outliers can be found in Figure 4A.  
623

| Pair           | MED            |          | ETH            |          | SAF            |          |
|----------------|----------------|----------|----------------|----------|----------------|----------|
| Gene name      | $P_{ST}$ value | quantile | $P_{ST}$ value | quantile | $P_{ST}$ value | quantile |
| <i>Iml1</i>    | 0.58           | 0.0177   | 0.85           | 0.0055   | 0.79           | 0.0001   |
| <i>larp</i>    | 0.42           | 0.0532   | 0.70           | 0.0401   | 0.51           | 0.0074   |
| <i>Smox</i>    | 0.49           | 0.0345   | 0.66           | 0.0607   | 0.49           | 0.0087   |
| <i>sky</i>     | 0.38           | 0.0694   | 0.68           | 0.0529   | 0.47           | 0.0102   |
| <i>AGO1</i>    | 0.36           | 0.0818   | 0.70           | 0.0423   | 0.45           | 0.0134   |
| <i>CG10365</i> | 0.53           | 0.0251   | 0.67           | 0.0553   | 0.39           | 0.0195   |
| <i>Nep13</i>   | 0.35           | 0.0840   | 0.64           | 0.0744   | 0.34           | 0.0270   |
| <i>CG42674</i> | 0.34           | 0.0948   | 0.84           | 0.0057   | 0.29           | 0.0383   |
| <i>CrebB</i>   | 0.44           | 0.0461   | 0.74           | 0.0268   | 0.24           | 0.0566   |
| <i>Cka</i>     | 0.56           | 0.0202   | 0.75           | 0.0249   | 0.23           | 0.0606   |
| <i>par-1</i>   | 0.34           | 0.0883   | 0.70           | 0.0396   | 0.22           | 0.0713   |
| <i>CG5116</i>  | 0.45           | 0.0432   | 0.78           | 0.0171   | 0.20           | 0.0796   |

624 Table 2. The  $P_{ST}$  values and quantiles for the 12 genes that passed the top 10% cutoff with consistent  
625 expression changes across three population pairs at the adult stage.  
626

627 The analysis above requires genes being outliers in both population pairs, which is quite restrictive  
628 (the naive expected proportion of sharing between two pairs under a 5%  $P_{ST}$  cutoff is  $5\% \times 5\% \times 0.5 =$

629 0.125%) and may miss some broader patterns of parallel changes. We therefore performed a  
 630 complementary analysis which only required genes being outliers in one population pair and  
 631 examined whether the expression for this set of genes changed in the same direction in another pair,  
 632 regardless of outlier status in the latter pair. For example, 235 genes were outliers in the MED pair at  
 633 the larval stage. Then in another pair, we calculated the fraction of the 235 genes with expression  
 634 differences between cold- and warm-derived populations in the same direction as for MED. There  
 635 were excesses of co-directional changes for the larval stage (Figure 4B). The patterns were weaker  
 636 for the adult stage and there were excesses of anti-directional changes for the pupal stage. Changing  
 637 the  $P_{ST}$  cutoff to 2.5% or 10% produce qualitatively similar patterns (Fig. S6).  
 638

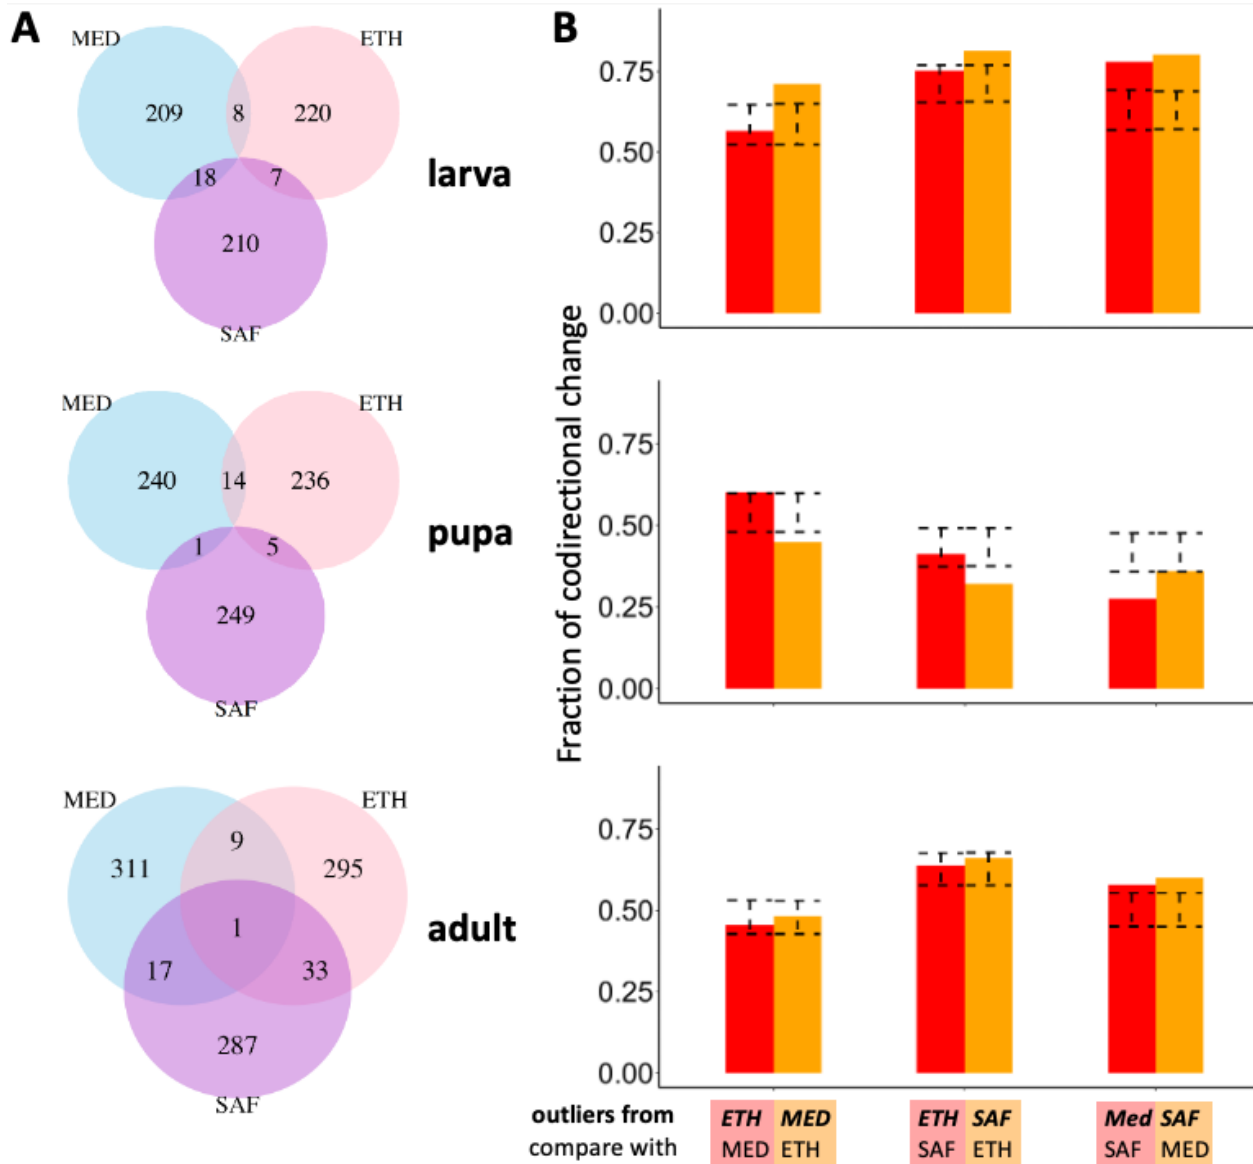

639

640 Fig. 4. Extent and direction of parallel evolution in gene expression among population pairs. (A)  
641 Venn diagrams for the numbers of shared outliers with co-directional changes between pairs and the  
642 rest of genes. (B) Fractions of co-directional gene expression changes between pairs for the  $P_{ST}$   
643 outliers identified in one pair of them. The name above is the pair used to identify outliers. The name  
644 below is the other pair in the comparison. The outliers used for each bar is the summed number of the  
645 pair in the Venn diagram. The dashed error bar indicates the 95% confidence interval for the fraction  
646 of co-directional expression changes in permuted data. If the real data is outside the range of the error  
647 bar, it indicates the fraction is significantly different from random expectation ( $p < 0.05$ , two-sided  
648 test based on permuted distribution).  
649

650 We also performed similar analyses for  $P_{ST}$  outliers of alternative intron usage. The numbers of  
651 intron-excision junctions that passed the cutoffs for  $P_{ST}$  calculation were 4520 for larva, 5574 for  
652 pupa, and 7367 for adult. The adjusted gene quantiles for splicing are listed in Table S5. The patterns  
653 of co-directional changes were qualitatively similar to those for gene expression (Fig. S7). The  
654 fractions of co-directional changes were still highest for the larvae among the three stages; all of the  
655 comparisons except one showed an excess of co-directional changes relative to the background level,  
656 although only one comparison is significant based on the permutation test (outliers from MED being  
657 co-directionally expressed in SAF). Overall, the patterns for co-directional changes were weaker for  
658 splicing than those for gene expression. Table S9 lists the genes with the top 20  $P_{ST}$  for both  
659 expression and intron usage for each population pair. An interesting example is *curled*, which is  
660 an extreme splicing outlier for ETH and MED, and an extreme expression outlier for ETH as  
661 well. Also known as *nocturnin*, one isoform of this gene is thought to have a dedicated role in  
662 circadian regulation (Nagoshi et al. 2010).

663

#### 664 *Enriched functional categories for the $P_{ST}$ outliers*

665 Significant Gene Ontology (GO) terms enriched in different sets of  $P_{ST}$  outliers for gene expression  
666 are listed in Table S10. Among the significant GO terms for different population pairs, we found five  
667 terms shared between the MED pair (24 significant terms) and ETH pair (47 significant terms) at the  
668 adult stage (mitochondrion, nucleoside metabolic process, ribonucleoside metabolic process, purine  
669 nucleoside metabolic process and oxidation-reduction process). The level of sharing was  
670 significantly more than expected by chance based on permuted outlier sets ( $p < 0.001$ , no shared GO  
671 terms were found in the permuted datasets), suggesting functional convergence for adult  
672 development to the cold environment for the MED pair and ETH pair. Further, similar (though non-  
673 identical) GO terms were identified from different pairs at different stages such as terms related to  
674 mitochondria, nucleoside metabolism, and oxidoreductase complex. However, the majority of GO



675 terms were unique for different pairs, suggesting that many functional changes for adaptation to cold  
676 environments may be population-specific. For intron usage, we only found one significant GO term  
677 for SAF pair at the larval stage (meiotic cell cycle).

678

### 679 *Cis- and trans-acting contributions to differential gene expression at the adult stage*

680 Gene expression differentiation can be caused by *cis*- or *trans*-regulatory effects. A *cis*-effect comes  
681 from a local regulatory mutation and results in an allele-specific expression difference in a F1 hybrid;  
682 while a *trans*-effect is caused by remote loci that modify both alleles in a diploid cell. Therefore, a  
683 *cis*-effect can be estimated by the allelic expression in F1 hybrid (Cowles et al. 2002). We quantify  
684 that effect based on the expression proportion in the F1 offspring of a between-population cross for  
685 the allele from the cold population minus 0.5 (null expectation when *cis*-effect absent). A *trans*-effect  
686 can be estimated by the expression difference between parents that was not attributed to the *cis*-effect  
687 (Wittkopp et al. 2004), as described in the Materials and Methods.

688

689 First, we described the transcriptome-wide patterns of *cis*- and *trans*-effect sizes across all analyzed  
690 genes at the adult stage. The magnitudes of *trans*-effect sizes were significantly larger than the *cis*-  
691 effect sizes in all three population pairs (mean absolute *cis*-effects and *trans*-effects were: MED pair,  
692 0.07 vs. 0.16,  $p < 2.2e-16$ ; ETH pair, 0.07 vs. 0.16,  $p < 2.2e-16$ ; SAF pair, 0.09 vs. 0.11,  $p < 2.2e-16$ .  
693 ‘Mann-Whitney’ paired test.). Moreover, we found strong negative relationships between *cis*- and  
694 *trans*-effects within each population pair (Fig. S7), where the *cis*- and *trans*-effects were generally in  
695 the opposite directions. Although the pattern can be biologically meaningful, it may also represent an  
696 artifact from using the same F1 expression data for allele specific expression (ASE) estimation to  
697 infer both *cis*- and *trans*-effects. Any measurement error on ASE will introduce an artifactual  
698 negative correlation between *cis*- and *trans*-acting changes (see Discussion below).

699

700 Next, we used our flexible permutation approach (see Materials and Methods and supplementary  
701 document) to study how many genes show a significant *cis*-effect, *trans*-effect, or both among the  
702 three population pairs (Table 3). Fig. 5A shows a graphical depiction of *cis*- and *trans*-effects on F1  
703 and parental samples, illustrating *cis*-effects influence both F1 allele-specific expression and the  
704 parental expression ratio while *trans*-effects only influence the parental expression ratio. Averaged  
705 across population pairs, about 60% of genes show significant *cis*- and/or *trans*-effects (62% for  
706 outliers and 59% for non-outliers). We also found that 19% of genes show *cis*-regulatory effects

707 while 53% of them show *trans*-effects, consistent with *trans*-effects being stronger on average than  
 708 *cis*-effects. This apparently greater prevalence of *trans*-regulatory evolution was observed in spite of  
 709 our lesser power to detect *trans*- relative to *cis*-effects (Supplementary Text).  
 710

| pair | expression type   | Total tests | <i>Cis</i> only | <i>Trans</i> only | Both co-dir | Both anti-dir | Neither    |
|------|-------------------|-------------|-----------------|-------------------|-------------|---------------|------------|
| MED  | $P_{ST}$ outliers | 184         | 20 (11%)        | 74 (40%)          | 6 (3%)      | 14 (8%)       | 70 (38%)   |
|      | Non-outliers      | 4182        | 199 (5%)        | 2203 (53%)        | 99 (2%)     | 324 (8%)      | 1357 (32%) |
| ETH  | $P_{ST}$ outliers | 231         | 12 (5%)         | 136 (59%)         | 10 (4%)     | 14 (6%)       | 59 (26%)   |
|      | Non-outliers      | 4569        | 297 (7%)        | 2224 (49%)        | 137 (3%)    | 379 (8%)      | 1532 (34%) |
| SAF  | $P_{ST}$ outliers | 167         | 22 (13%)        | 47 (28%)          | 0 (0%)      | 15 (9%)       | 83 (50%)   |
|      | Non-outliers      | 3993        | 250 (6%)        | 691 (17%)         | 40 (1%)     | 738 (18%)     | 2274 (57%) |

711 Table 3. The relative prevalence of significant *cis*- and *trans*-regulatory differences for  $P_{ST}$  outliers  
 712 versus non-outliers varies among population pairs. Numbers of gene expression abundance traits  
 713 showing different regulatory effects for  $P_{ST}$  outliers and non-outliers are shown. The percentage in  
 714 parentheses indicates the fraction of genes in each category relative to total genes in the tests.  
 715

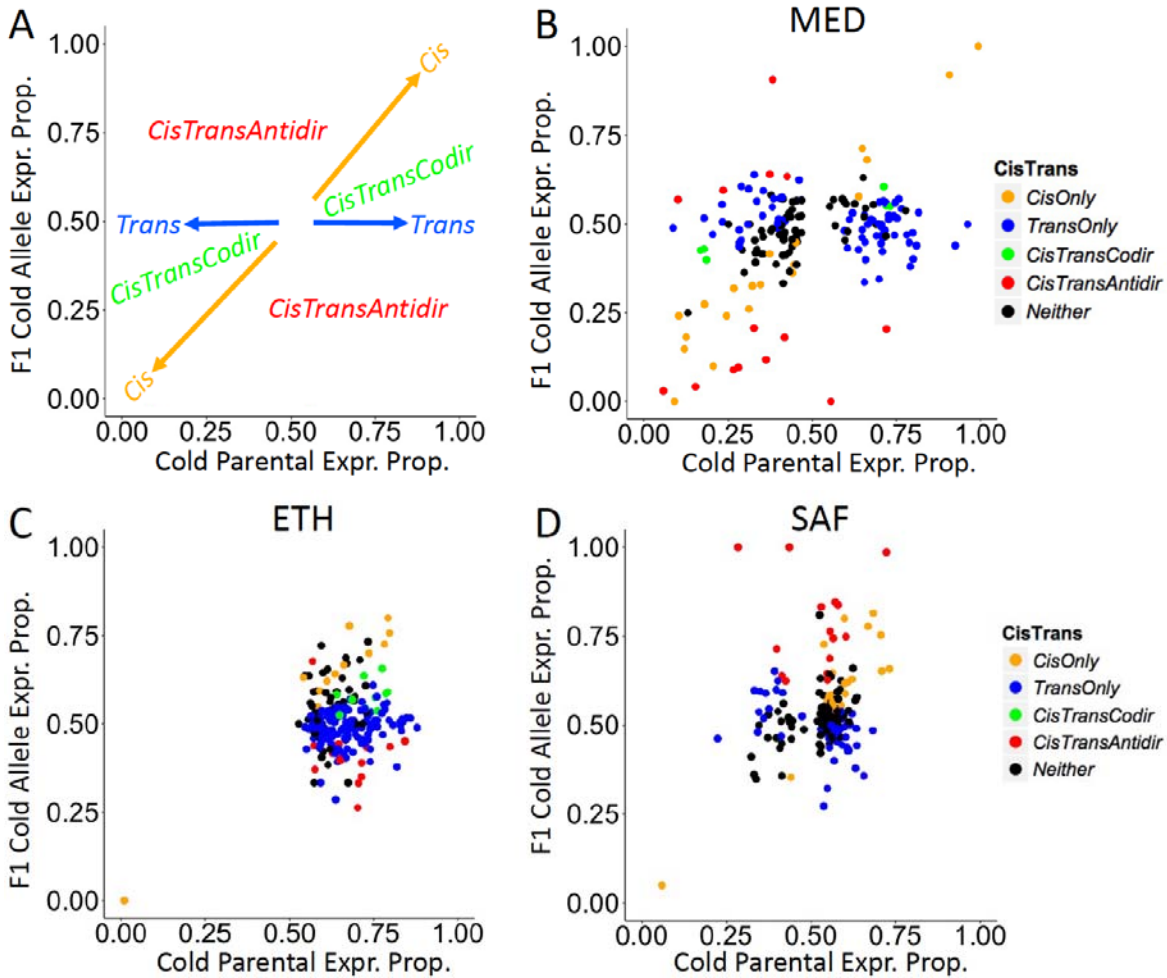

716

717 Fig 5. Population pairs show distinct patterns of *cis*- and *trans*-regulatory evolution for expression  
 718 outliers. These plots depict evidence for *cis*- and *trans*-regulatory evolution based on the relative  
 719 expression proportion of cold strain alleles in parental and F1 datasets. (A) Conceptual depiction of  
 720 *cis*- and *trans*-effects. *Cis*-effects change the F1 allele-specific expression and the parental expression  
 721 proportion concordantly (along the one-to-one ratio line). *Trans*-effects only change the parental  
 722 expression proportion but not the F1 allele-specific expression (vertical line  $y = 0.5$ ). Co-directional  
 723 *cis*- and *trans*-effects (*CisTransCodir*) locate in the two spaces within the  $45^\circ$  angle between the *Cis*  
 724 vector and the *Trans* vector. Anti-directional *cis*- and *trans*-effects (*CisTransAntidir*) locate in the  
 725 two spaces within  $135^\circ$  angle between *Cis* vector and *Trans* vector. (B-D) Evidence for *cis*- and  
 726 *trans*-regulatory evolution of putatively adaptive expression differences between warm- and cold-  
 727 derived populations (expression  $P_{ST}$  outliers).  
 728

729 To examine the *cis*- and *trans*-regulatory contributions to adaptive evolution of gene expression, we  
 730 compared genes showing *cis*- or *trans*-effects between  $P_{ST}$  outliers (Fig. 5B-D) and non-outliers.

731 Because of the potential artifact generating opposing *cis*- and *trans*-effects, we excluded genes  
 732 showing both significant *cis*- and *trans*-effects in opposite directions (Both anti-dir category in Table  
 733 3). For genes showing significant *cis*-effects (Fig. 6A), they were enriched in the outliers relative to

734 the non-outliers for the MED pair ( $\chi^2 = 11.6$ ,  $df = 1$ ,  $p = 0.00066$ ) and the SAF pair ( $\chi^2 = 4.8$ ,  $df = 1$ ,  
735  $p = 0.029$ ) but not for the ETH pair ( $\chi^2 < 0.01$ ,  $df = 1$ ,  $p = 1$ ). While for significant *trans*-effects  
736 genes (Fig. 6B), they were enriched in the outliers relative to the non-outliers for the ETH pair ( $\chi^2 =$   
737  $9.6$ ,  $df = 1$ ,  $p = 0.0019$ ) and the SAF pair ( $\chi^2 = 5.4$ ,  $df = 1$ ,  $p = 0.020$ ) but the enrichment is opposite  
738 for the MED pair ( $\chi^2 = 10.2$ ,  $df = 1$ ,  $p = 0.0014$ ).

739

740 Because theory suggests that co-regulation of genes can amplify the contribution of *trans*-effects (Liu  
741 et al. 2019), we examined the level of co-regulation between pairwise outliers by calculating the  
742 correlation coefficient between the expression values among the eight outbred samples within each  
743 cold-derived population. Indeed, the percentage of pairwise correlation with evidence of co-  
744 regulation ( $p$ -value  $< 0.05$ ) is much higher in EF population than that in FR and SD populations (Fig.  
745 6C, Table S11). At the gene level, the median number of significant co-regulatory partners for EF is  
746 about twofold that for FR and SD (Fig. 6D). This pattern supports the hypothesis that substantial co-  
747 regulation of outlier genes results in more significant *trans*-effects for the ETH pair (Fig. 6B).  
748 Further, the strong co-regulation in EF might be related to the asymmetry observed in the ETH  
749 outliers (Fig. 2). However, the pattern could reflect variation in cell type content among strains rather  
750 than co-regulation within cells (see Discussion).

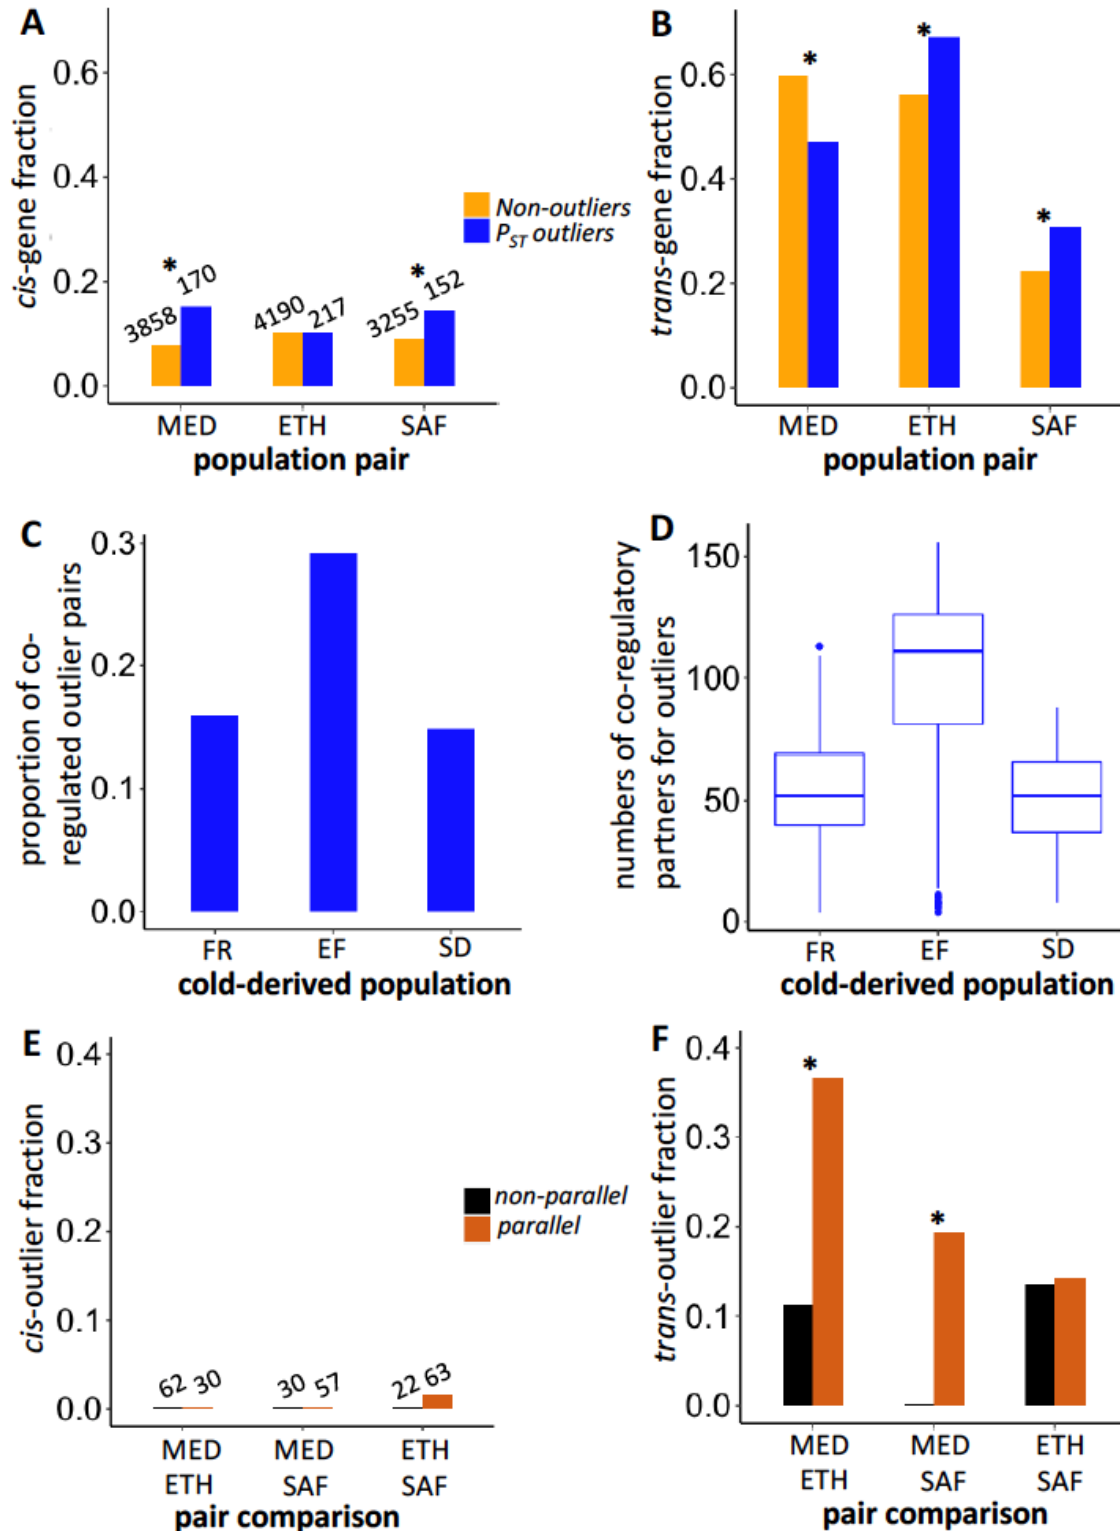

751  
 752 Fig 6. The prevalence of *cis*- versus *trans*-regulatory  $P_{ST}$  outliers differs between population pairs,  
 753 while *trans* changes show greater parallelism. The upper panels show the fractions of genes with *cis*  
 754 regulatory effects (A) and those with *trans*-effects (B) for  $P_{ST}$  outliers and non-outliers in each  
 755 population pair. The middle panels show the proportion of co-regulated pairs among all pairwise  
 756 outliers (C) and the numbers of co-regulatory partners for outlier genes (D) in each cold-derived

757 population. The lower panels show the fractions of parallel outlier genes (*i.e.* shared and  
758 codirectional between population pairs) and non-paralleled outlier genes (*i.e.* shared and anti-  
759 directional between population pairs) showing *cis*-effect (E) and *trans*-effect (F) in different  
760 population pairs. The number above the bar for the *cis*-effect shows the denominator of the fraction,  
761 which applies to the *trans*-effect results as well. \* indicates the fractions are significantly different  
762 between two categories ( $p < 0.05$ ).

763

764 To study the role of *cis*- and *trans*-regulatory effects on the parallel adaptation, we further focused on  
765 the outlier genes. We categorized the top 10%  $P_{ST}$  outliers based on whether they were shared  
766 between two pairs with consistent expression changes (parallel) or opposite changes (non-parallel).  
767 Because genes with *cis*- (or *trans*-) effects in both population pairs in the parallel category would  
768 indicate the contribution of *cis*- (or *trans*-) effects to parallel adaptive evolution, we identified shared  
769 outlier genes with *cis*- (or *trans*-) effects in any two pairs in both parallel and non-parallel categories  
770 (excluding genes showing both significant *cis*- and *trans*-effects in opposite directions). For *cis*-  
771 effects, only one gene (*CG42788*) is significant in both ETH and SAF pairs (Fig. 6E). While for  
772 *trans*-effects, the numbers of genes showing *trans*-effect are four for the MED and ETH pairs  
773 (*CG8034*, *CG33981*, *kst* and *wdb*), two for the MED and SAF pairs (*scf* and *AP-2 $\sigma$* ) and four for the  
774 ETH and SAF pairs (*CG7766*, *Dlg5*, *larp* and *Pink1*). Of these, *larp* had  $P_{ST}$  quantiles near or below  
775 0.05 in all three population pairs (Table 2); its functions include mitochondrial regulation (Zhang et  
776 al. 2019). There are significant enrichments of *trans*-effect genes in the parallel outlier category  
777 relative to the non-parallel category in two out of three population pair comparisons (Fig. 6F, MED  
778 & ETH:  $p = 0.0097$ ; MED & SAF:  $p = 0.014$ ; ETH & SAF:  $p = 1$ ; Fisher's Exact Tests). As a  
779 complementary analysis, we also included the non-shared outliers in the non-parallel category, and  
780 we found qualitatively similar patterns for *cis*- and *trans*-effects (Fig. S9). Overall, there is stronger  
781 evidence of *trans*-regulatory evolution contributing to parallel gene expression changes between  
782 cold-adapted populations.

783

#### 784 *Cis- and trans-acting contributions to differential intron usage at the adult stage*

785 For all intron usage traits, we found the magnitude of *trans*-effects on average to be higher than that  
786 of *cis*-effects (mean absolute *cis*-effects and *trans*-effects are: MED pair, 0.13 vs. 0.17,  $p = 0.0001$ ;  
787 ETH pair, 0.30 vs. 0.32,  $p = 0.04$ ; SAF pair, 0.17 vs. 0.19,  $p = 0.0044$ . 'Mann-Whitney' paired test).  
788 Because of the limited diagnostic SNPs with enough read depth located in the intron junction regions,  
789 there are few outlier introns tested for *cis*- and *trans*-regulatory effects (Table S12).

790

791 *Elevated genetic differentiation at cis-regulated expression outliers*

792 Since the *cis*-regulatory mutations contributing to local adaptation may show differentiation in allele  
793 frequency between populations, we examined genetic differentiation for expression outliers with *cis*-  
794 effects (including *cis*-only genes and genes with both *cis*- and *trans*-effects to increase sample sizes).  
795 We examined whether each of these *cis*-outliers shows high  $F_{ST}$  between that pair of cold- and warm-  
796 adapted populations – for both window  $F_{ST}$  ( $F_{ST\_winmax}$ ) and maximum SNP  $F_{ST}$  ( $F_{ST\_SNPmax}$ ). A gene  
797 showing both significant *cis*-effect and higher  $F_{ST}$  quantile (here, the top 5% versus comparable  
798 genomic regions) could reflect adaptive regulatory evolution targeting the surveyed sequences or  
799 nearby sites. We first confirmed that there is little chromosomal scale differentiation between  
800 populations (aside from known moderate X-autosome differences for the MED pair; Lack et al. 2015)  
801 by plotting window  $F_{ST}$  across the major chromosome arms (Fig. S8). We observed no obvious  
802 clustering of  $P_{ST}$  outliers along the chromosome arms. For window  $F_{ST}$  (Fig. 7A), high  $F_{ST}$  is  
803 enriched in *cis*-effect outliers relative to the non-outliers for the MED pair ( $p = 0.022$ . Fisher's Exact  
804 Test) and the other two pairs show the same trend (ETH:  $p = 0.22$ ; SAF:  $p = 0.23$ ). Although the  
805 MED result would be only marginally significant if correcting for the three tests performed, a clearer  
806 result is obtained when considering the three population pairs together. In this analysis, the fractions  
807 of genes with high window  $F_{ST}$  were significantly higher in *cis*-outliers than that in non-outliers  
808 (likelihood ratio test,  $p = 0.0056$ ). For maximum SNP  $F_{ST}$  (Fig. 7B), the MED and SAF pairs showed  
809 significant enrichments of high  $F_{ST}$  in *cis*-effect outliers versus the non-outliers, while the ETH pair  
810 showed a weak trend in that direction (MED:  $p = 0.012$ ; ETH:  $p = 0.49$ ; SAF:  $p = 0.030$ ). Similar  
811 analysis combining the three pairs found that the fractions of high maximum SNP  $F_{ST}$  were  
812 significantly higher in *cis*-outliers than that in non-outliers (likelihood ratio test,  $p = 0.0045$ ). These  
813 results reflected more than two-fold enrichment of  $F_{ST}$  outliers among *cis*-regulated  $P_{ST}$  outliers  
814 across population pairs.

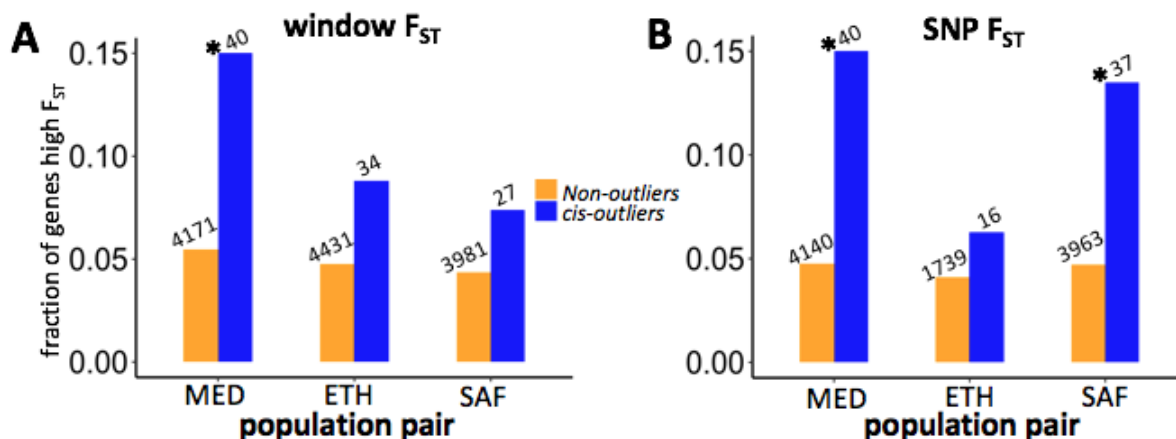

815

816 Fig. 7. Enrichment of *cis-outliers* for genes with high window  $F_{ST}$  (A) and high SNP  $F_{ST}$  (B) for each  
817 population pair. The number above the bar shows the denominator of the fraction. \* indicates the  
818 fractions are significantly different between *cis*-effect outliers and non-outliers ( $p < 0.05$ , Fisher's  
819 Exact Test).  
820

821 We further examined potential targets of *cis*-regulatory local adaptation, excluding genes with *cis*-  
822 effects and trans-effects in the opposite directions. For the *cis*-genes of the MED pair, *Ciao1* and  
823 *Cyp6a22* showed high window  $F_{ST}$ , *CG42565* showed high  $F_{ST\_SNPmax}$ , and *CG8034* and *Cyp6a17*  
824 showed both. *CG8034* (a predicted monocarboxylic acid transporter) was also cited above as having  
825 parallel *trans*-regulatory evolution between the MED and ETH pairs, and this gene's *cis*- and *trans*-  
826 effects were both upregulated in FR relative to EG in MED. *CG42565* represents a differentially-  
827 spliced product of a transcript that alternatively yields an isoform of *CG13510*, which is upregulated  
828 in response to cold (Qin et al. 2005). Interestingly, *Cyp6a22* and *Cyp6a17* belong to the cytochrome  
829 P450 protein family (*Cyp6a22* is 248 bp upstream of *Cyp6a17*). This region harbors a polymorphic  
830 deletion of *Cyp6a17* which is associated with both colder temperature preference (Kang et al. 2011;  
831 Chakraborty et al. 2018) and lower insecticide resistance (Duneau et al. 2018). Based on the  
832 diagnostic SNPs for *Cyp6a17* (Good et al. 2014), we found the France-enriched allele for *Cyp6a22* is  
833 likely linked to the *Cyp6a17* deletion. Likewise, at the population level, the frequency of intact  
834 *Cyp6a17* copy is 0.44 in France and 0.95 in Egypt. Hence, adaptive expression differences may  
835 sometimes be driven by gene copy number differentiation between populations. For the *cis*-genes of  
836 ETH, *RpL24* showed high window  $F_{ST}$  and *KrT95D* showed high  $F_{ST\_SNPmax}$ . For SAF, *GXIVsPLA2*  
837 showed high  $F_{ST\_SNPmax}$ , while *AGO2* showed both high window  $F_{ST}$  and high  $F_{ST\_SNPmax}$ . *AGO2* is  
838 involved with antiviral defense and developmental regulation (Deshpande et al. 2005; Nayak et al.  
839 2010) and was previously found to contain fixed differences between European and African  
840 populations (Pool 2015). For the genes showing high  $F_{ST\_SNPmax}$  in any pair, we plotted the SNP  $F_{ST}$   
841 along the gene region and nearby 20kb to show the sites that may be the most likely targets of  
842 selection (Fig. 8). For *CG42565*, *CG8034* and *KrT95D*, we observed that the highest  $F_{ST}$  sites were  
843 located within the gene regions. While for *GXIVsPLA2*, the highest SNP  $F_{ST}$  was 1758 bp  
844 downstream of the gene. For *AGO2*, the highest SNP  $F_{ST}$  was 6359 bp downstream but the third  
845 highest SNP  $F_{ST}$  was within the gene. Overall, the genetic differentiations between cold- and warm-  
846 derived populations around these candidate genes can be quite local, but the linked signal of natural  
847 selection can extend further, and there are often multiple SNPs that could represent plausible targets  
848 of local adaptation within and outside a given gene region.  
849



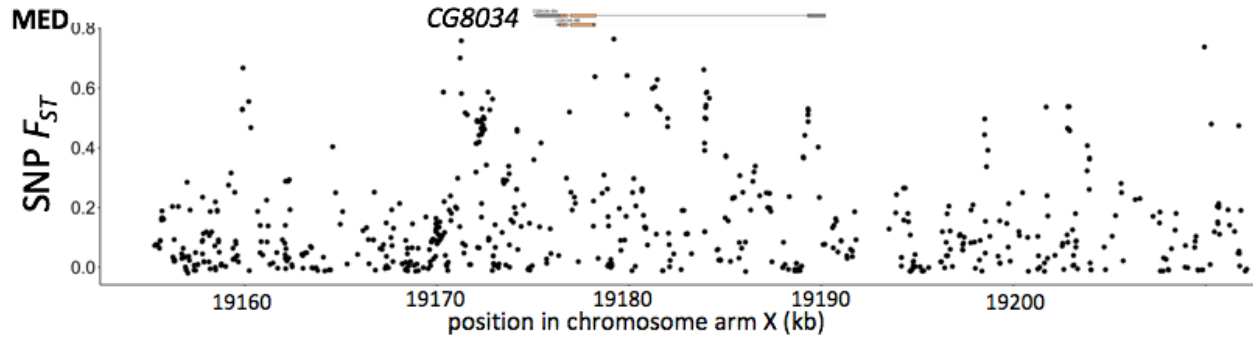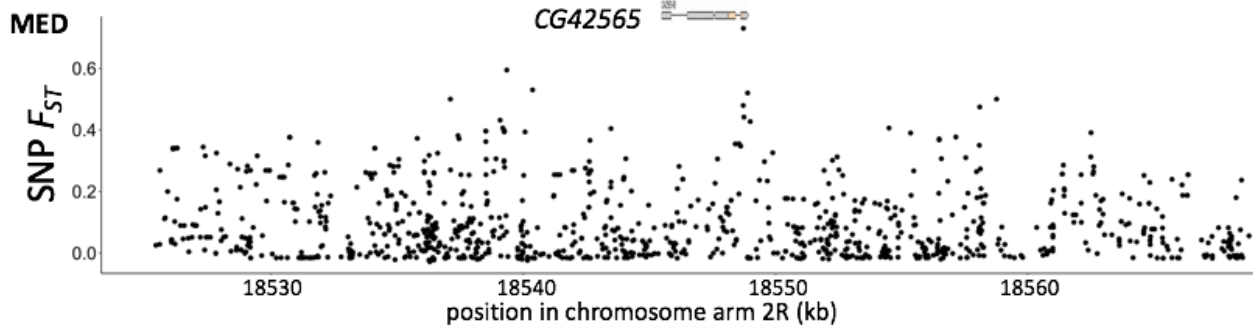

850

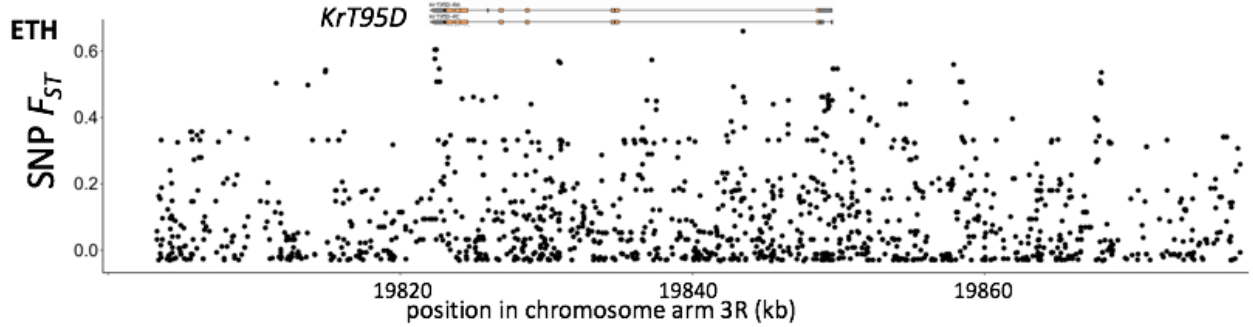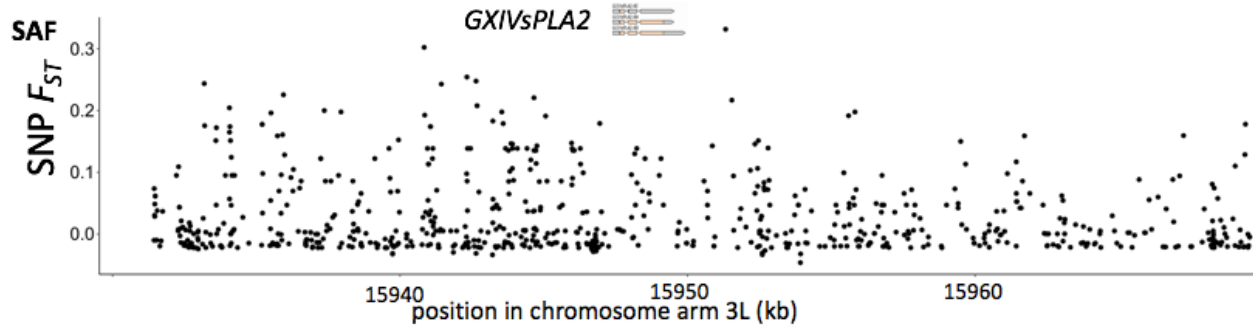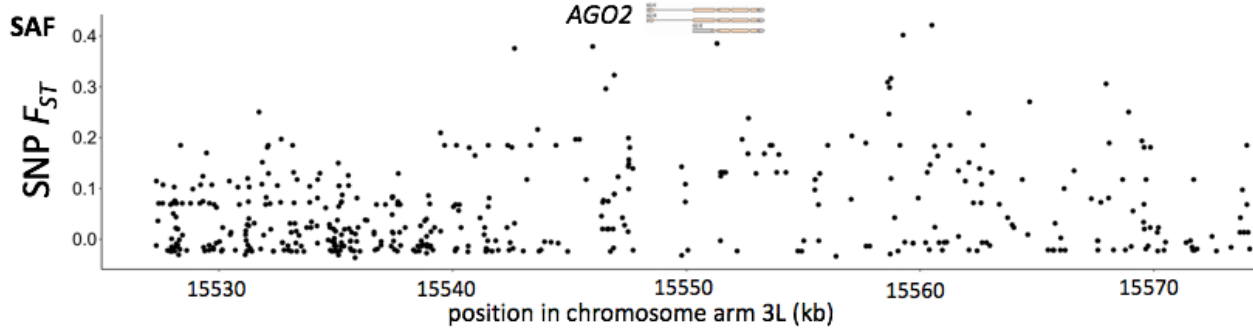

851

852 Fig 8. Local peaks of  $F_{ST}$  between warm- and cold-derived populations are observed at some  
853 candidate genes for adaptive cis-regulatory evolution. SNP  $F_{ST}$  along the candidate genes with  
854 flanking regions of 20kb is shown. The top diagram depicts the coding (orange) and non-coding  
855 (gray) exon, captured from GBrowse 2 of *D. melanogaster* (R5.57) from FlyBase (St. Pierre et al.  
856 2014). *Cyp6a17* is not plotted because of the known gene-scale polymorphic deletion.  
857

858

## 859 Discussion

860 Parallel evolution has often been studied at the population genetic and trait levels, but it has less  
861 frequently been analyzed at the transcriptome level (Stern 2013; Juneja et al. 2016). In this study, we  
862 used three recent instances of adaptation to colder climates in *Drosophila melanogaster* to study the  
863 evolution of gene expression and alternative splicing. We found a unique pattern of transcriptomic  
864 evolution in the high altitude EF sample, involving elevated expression of highly expressed muscle  
865 proteins and many other genes. We found the locations of differentially expressed genes on the X  
866 chromosome versus the autosomes varies among developmental stages, with the adult female stage  
867 having relatively more differentially expressed X-linked genes than the larval stage. We then saw  
868 signals of parallel evolution in expression that were higher for larval and adult stages than for pupa.  
869 Further, we studied *cis*- and *trans*-regulatory evolution in the context of this ecological adaptation,  
870 finding that the relative roles of these regulatory mechanisms differ strongly among population pairs.  
871 And we found a signal of *trans*-regulation contributing more predictably to the parallel evolution  
872 between population pairs. Finally, those outliers showing *cis*-effects were enriched for high genetic  
873 differentiation between populations, suggesting that some of them were the direct targets of selection  
874 in cold environments.

875

876 Previous comparative transcriptomic studies on multiple pairs of *Drosophila* populations/species  
877 have found parallel gene expression differences between high and low latitude populations (Zhao et  
878 al. 2015; Juneja et al. 2016). However, because both clines in Australia and North America came  
879 from admixtures between European and African ancestry and tropical populations in both clines have  
880 a greater proportion of African ancestry (Bergland et al. 2016), it is hard to disentangle adaptive  
881 divergence between high and low latitude populations from demographic effects. The demographic  
882 influences may be smaller when comparing clines between species pairs (Zhao et al. 2015).  
883 Interestingly, the latter study found 10% to 20% differential expressed genes between high and low  
884 latitude populations were shared and changed co-directionally between two species *D. melanogaster*

885 and *D. simulans*. The percentages are even higher than what we found between population pairs at  
886 adult stages (3% to 10%).

887

888 One important reason for the milder patterns of parallelism among our population pairs may be the  
889 different selection agents in their unique habitats. In Zhao et al. 2015, samples from the high and low  
890 latitude populations from both species were collected in the same areas. While for us, the cold-  
891 derived FR population from the MED pair colonized a higher latitude environment than the related  
892 warm population, whereas the other two cold-derived populations colonized higher altitude  
893 environments where the selection agents may include air pressure, desiccation and ultraviolet  
894 radiation (Pool et al. 2017). Although EF and SD have both adapted to higher altitudes (EF at 3,070  
895 meters above sea level, SD at 2,000), SD is seasonally cold (like FR) whereas EF is perpetually cool.  
896 We should also note that the standing variation available for adaptation may have differed between  
897 our cold-derived populations due to their distinct demographic histories, including the trans-Saharan  
898 bottleneck affecting the MED pair and a milder bottleneck in the history of the ETH pair, but no  
899 meaningful bottleneck involving the SAF pair (Sprengelmeyer et al. 2020). Hence, although we do  
900 significant evidence of parallel gene regulatory adaptation, we suggest that there are both ecological  
901 and population genetic reasons to expect substantial non-parallel adaptation as well.

902

903 Notably, the EF population exhibits distinct phenotypic evolution such as darker pigmentation  
904 (Bastide et al. 2014), larger body size (Pitchers et al. 2013; Lack et al. 2016b), and reduced  
905 reproductive rate (Lack et al. 2016b). This distinct evolution in the EF population may explain the  
906 strong directionality in gene expression changes between EF and EA for the outliers (Fig. 2), the  
907 greater abundance of *trans*-regulatory outliers, and the elevated levels of co-regulation among  
908 outliers (Fig. 6). Therefore, the underlying transcriptomic evolution for EF may partly reflect its  
909 unique phenotypic evolution, not just adaptation to lower temperature. For example, the upregulation  
910 of muscle proteins could reflect the differential abundance of tissues between these Ethiopian  
911 populations that differ in size. This size evolution may have also altered the relative proportions of  
912 different cell types, which may have driven some of the population differences in gene regulation  
913 observed from our whole-organism samples. Future tissue-specific or cell type-specific expression  
914 studies involving the EF population can help to examine these possibilities.

915

916 We found some evidence of parallel expression evolution between our cold-adapted populations.  
917 Developmental stage has a strong effect on the levels of this parallelism, with adult and larva

918 showing significant parallelism while pupa showed a much weaker pattern (Table 1; Figure 4). This  
919 is consistent with the observations that larval and adult stages show local adaptation to native  
920 temperature but not the pupal stage (Austin and Moehring 2020). It is possible that pupal  
921 metamorphosis might reflect a relatively constrained developmental program that limits opportunities  
922 for thermal adaptation. The high level of detected parallelism in larvae could also reflect a higher  
923 detection power due to less tissue diversity and hence broader spatiotemporal expression of relevant  
924 differences. The intriguing pattern of anti-parallelism for some combinations of the pupal stages  
925 might suggest that other selective agent is more important than cold (e.g., oxygen level, ultraviolet  
926 radiation) for certain population pairs and the direction of selection on gene expression is opposite to  
927 the cold. Further, the anti-directional pattern at the pupal stage could be caused by different rates of  
928 development for cold-derived populations relative to the warm-derived ones in different pairs.  
929 Evidence for such differences is mixed: rates were found to differ between high and low latitude  
930 populations in Australia (James & Partridge 1995) but not between our EF and ZI populations (Lack  
931 et al. 2016b). Because tissues at different days can generate a wide range of gene expression  
932 difference (Hsu et al. 2019), if the cold-derived population develops faster than the warm-derived  
933 one in one pair but in another pair the cold-derived population develops slower than the respective  
934 warm-derived one, many of the expression differences will be anti-directional between the two pairs.  
935 Moreover, because the pupal and larval samples were mixed sex, different rates of development for  
936 males and females could led to a biased sex ratio in a sample, especially for pupae (Testa et al. 2013).  
937 If the sex ratio bias happened in the cold-derived population in one pair but the warm-derived  
938 population in another, it could conceivably result in anti-directional patterns for sex-biased genes.  
939  
940 Compared to the expression abundance, the pattern of parallelism is much weaker for intron usage  
941 (Fig S7), which may partly stem from lower power to detect intron usage change (only a small  
942 proportion of reads are informative for exon junctions). However, we still found the MED pair and  
943 SAF pair show more parallel changes than the combinations with the ETH pair, which is consistent  
944 with results for expression abundance. Given the increasing evidence for alternative splicing  
945 contributing to environmental response and adaptation (e.g., Singh et al. 2017; Signor and Nuzhdin  
946 2018; Smith et al. 2018), we need to study both expression abundance and splicing to fully  
947 understand the evolution at the transcriptome level. The development of sequencing approaches with  
948 long reads that cover the entire transcripts (e.g., Iso-Seq) will enable us to quantify isoforms  
949 frequency directly and broaden the scope of alternative splicing variation that can readily be  
950 quantified. Since splicing changes during development and among tissues (Brown et al. 2014;

951 Gibilisco et al. 2016), a detailed sampling throughout development of different tissues will also be  
952 necessary to understand the role of splicing on ecological adaptation.

953

954 We found *trans*-effects on expression were more common than the *cis*-effects across the  
955 transcriptome (Table 3), which is consistent with some previous studies (e.g., McManus et al. 2010;  
956 Coolon et al. 2014; Albert et al. 2018; Glaser-Shmitt et al. 2018) but not with others (e.g., Lemmon  
957 et al. 2014; Mack et al. 2016). The transcriptome-wide prevalence of *trans*-effects may be caused by  
958 random regulatory changes biased toward *trans*-regulation because of the larger *trans*-mutational  
959 target size (Landry et al. 2007; Metzger et al. 2016). Or, *trans*-regulatory changes may have higher  
960 potential for coordinate regulation of multiple genes in networks (Metzger et al. 2016; Liu et al.  
961 2019). To focus on the evolved changes potentially related to adaptation, we compared the  
962 proportion of genes with *cis/trans*-effects for  $P_{ST}$  outliers and to those for non-outliers and saw both  
963 effects were enriched in outliers in certain pairs (Fig. 6A & B). These results indicate that the  
964 mechanisms of adaptive gene regulatory evolution are highly population-specific, and that either  
965 regulatory mechanism has the potential to play a disproportionate role in ecological adaptation.

966

967 Moreover, we found a predominance of *trans*-effects associated with parallel outliers than the non-  
968 parallel outliers (Fig. 6E & F). In part because of the larger mutational target size of *trans*-regulatory  
969 variation for a given target gene, the standing genetic variation for *trans*-regulatory variants may be  
970 higher than the *cis*-ones in the ancestral population and therefore the *trans* variants can respond to  
971 selection in different population pairs. However, studies in *Arabidopsis thaliana* and *Capsella*  
972 *grandiflora* find that *trans*-eQTLs tend to have lower minor allele frequencies than *cis*-eQTLs  
973 (Zhang et al. 2011; Josephs et al. 2020) but it is unclear whether these populations represent the  
974 ancestral state before experiencing environmental changes. Also, the potential capacity of *trans*-  
975 regulatory factors to co-regulate many genes may amplify the probability of parallel changes between  
976 population pairs. Furthermore, since we used whole-body adult samples, it is possible that some  
977 *trans*-acting factors regulated genes similarly across tissues while the some *cis*-effects were tissue-  
978 specific and were undetected in our mixed-tissue samples. Finally, we emphasize that our study  
979 focuses on regulatory changes that may have relatively larger effects (in focusing on  $P_{ST}$  outliers, and  
980 in basing *cis/trans* analysis on strains showing clearer differences); but small changes may be  
981 important for regulatory evolution as well, and may be differentially represented between categories  
982 (e.g. *cis* vs. *trans*, parallel vs. non-parallel).

983

984 When we considered genes/introns showing both *cis*- and *trans*-effects, we observed that the two  
985 types of effects were generally in opposite directions (anti-directional; Table 3). This is consistent  
986 with the idea that gene regulation is under stabilizing selection in general and gene regulatory  
987 networks evolve negative feedback to buffer effects of regulatory changes (Denby et al. 2012;  
988 Coolon et al. 2014; Bader et al. 2015; Fear et al. 2016). With regard to our  $F_{ST}$  outliers, it is possible  
989 that *cis*-acting changes might have evolved to compensate for unfavorable pleiotropic impacts of  
990 adaptive *trans*-regulatory evolution (or possibly vice-versa). However, negative correlations between  
991 *cis*- and *trans*-effects can also be an artifact coming from the measurement error on F1 expression  
992 data. Because the F1 data was used to estimate ASE and compared it to 0.5 (*cis*-effect null) and to  
993 parental expression proportion (*trans*-effect null), measurement error will introduce artifactual  
994 negative correlation between *cis*- and *trans*-acting changes. Therefore, whether the opposing effects  
995 between *cis*- and *trans*-acting changes are biologically meaningful will require further study. As  
996 Fraser (2019) and Zhang and Emerson (2019) proposed, using independent F1 replicates or other  
997 approaches such as eQTL mapping to infer *cis*- and *trans*-effects separately is necessary to affirm  
998 evidence of compensatory evolution.

999

1000 We expect that the adaptive expression divergence caused by *cis*-regulatory changes should leave a  
1001 signal in the genetic variation of the nearby genomic region. Therefore, we used  $F_{ST}$  statistics to  
1002 quantify genetic differentiation for the region around the focal genes. Window  $F_{ST}$  is sensitive to  
1003 classic hard sweeps, and relatively useful for incomplete sweeps and moderately soft sweeps, but it is  
1004 less useful for soft sweeps with higher initial frequencies of the beneficial allele (Lange and Pool  
1005 2016), for which SNP  $F_{ST}$  may be more sensitive. Indeed, a previous genomic study on these same  
1006 populations found a stronger signal of parallel change for SNP  $F_{ST}$  than for window  $F_{ST}$  genome-wide  
1007 (Pool et al. 2017). Here, we found genes with outlier *cis*-effects are enriched for those that show high  
1008  $F_{ST}$ , especially those with high SNP  $F_{ST}$  (Fig. 7A & B). Hence, standing genetic variants may have  
1009 contributed importantly to the *cis*-regulatory changes for adaptation in our populations. Genes with  
1010 both significant *cis*-effects and high  $F_{ST}$  are likely to be the direct targets of the environmental  
1011 selection and good candidate for future mechanistic studies.

1012

1013 Using three natural fly population pairs with recent adaptive divergence, our study found intriguing  
1014 patterns of parallel evolution in gene expression and provided new insights on the underlying  
1015 regulatory effect. In the future, using other approaches to study *cis*- and *trans*-effects in these

1016 populations would be necessary, such as eQTL mapping, which can provide more genetic  
1017 information about the *trans*-regulatory loci. Also, studying the gene expression in different tissues,  
1018 including different organs from males and females, would provide us a clearer and more  
1019 comprehensive picture about parallel gene expression evolution. It would also be informative to  
1020 study other phenotypes besides gene expression that are more related to thermotolerance such as the  
1021 metabolic pathways identified in this study or nervous system function related to chill coma.  
1022 Moreover, studying the phenotypic plasticity at different developmental stages could help to explain  
1023 the different patterns of parallelism in expression evolution across stages and allow us to better  
1024 understand the importance of local adaptation versus plasticity in thermotolerance.

1025  
1026  
1027

#### 1028 Data Availability

1029 The raw RNAseq reads are available from the Sequence Read Archive (SRA) under accessions  
1030 SRR14179998-SRR14180176 and BioProject PRJNA720479. The population genomics data is  
1031 from the *Drosophila* Genome Nexus (Lack et al. 2016; <http://www.johnpool.net/genomes.html>).  
1032 Custom R and Perl scripts for the *cis*- and *trans*- effects simulation and analysis can be found at  
1033 [https://github.com/YuhengHuang87/simulation\\_cis\\_trans](https://github.com/YuhengHuang87/simulation_cis_trans).

1034

1035

#### 1036 Acknowledgements

1037 We thank Colin Dewey for helpful discussions and the UW-Madison Center for High Throughput  
1038 Computing (CHTC) for cluster usage. We thank Jeremy Lange for suggestions on *Cyp6a17* gene  
1039 analysis. This work was funded by NSF DEB grant 1754745 to JEP and by NIH NIGMS grant  
1040 F32GM106594 to JBL.

1041

1042

#### 1043 References

1044 Adrion JR , Hahn MW , Cooper BS. 2015. Revisiting classic clines in *Drosophila melanogaster*  
1045 in the age of genomics. Trends Genet 8:434–444.

1046 Alasoo K , Rodrigues J , Danesh J , Freitag DF , Paul DS , et al. 2019. Genetic effects on  
1047 promoter usage are highly context-specific and contribute to complex traits. Elife. 8.  
1048 doi:10.7554/eLife.41673

1049 Albert FW, Bloom JS, Siegel J, Day L, Kruglyak L. 2017. Genetics of *trans*-regulatory variation  
1050 in gene expression. eLife 100:371–44.

1051 Arthaud L, Ben Rokia-Mille S, Raad H, Dombrovsky A, Prevost N, et al. 2011. Trade-off  
1052 between toxicity and signal detection orchestrated by frequency- and density-dependent  
1053 genes. PLoS One 6: e19805.

- 1054 Austin CJ, Moehring AJ. 2019. Local thermal adaptation detected during multiple life stages  
1055 across populations of *Drosophila melanogaster*. *J. Evol. Biol.* 32, 1342–1351.
- 1056 Bader DM, Wilkening S, Lin SG, Tekkedil MM, Dietrich K, et al. 2015. Negative feedback  
1057 buffers effects of regulatory variants. *Mol Syst Biol* 11:785.
- 1058 Barbosa-Morais NL, Irimia M, Pan Q, Xiong HY, Gueroussov S, et al. 2012. The evolutionary  
1059 landscape of alternative splicing in vertebrate species. *Science* 338:1587–93.
- 1060 Bastide H, Yassin A, Johannig EJ, Pool JE. 2014. Pigmentation in *Drosophila melanogaster*  
1061 reaches its maximum in Ethiopia and correlates most strongly with ultra-violet radiation in  
1062 sub-Saharan Africa. *BMC Evol Biol* 14:222–14.
- 1063 Benjamini Y, Hochberg Y. 1995. Controlling the false discovery rate—a practical and powerful  
1064 approach to multiple testing. *J Royal Stat Soc B* 57:289–300.
- 1065 Bergland AO, Tobler R, González J, Schmidt P, Petrov D. 2016. Secondary contact and local  
1066 adaptation contribute to genome-wide patterns of clinal variation in *Drosophila*  
1067 *melanogaster*. *Mol Ecol* 25:1157–1174.
- 1068 Božičević V, Hutter S, Stephan W, Wollstein A. 2016. Population genetic evidence for cold  
1069 adaptation in European *Drosophila melanogaster* populations. *Mol Ecol* 25:1175–1191.
- 1070 Brommer JE. 2011. Whither  $P_{ST}$ ? The approximation of  $Q_{ST}$  by  $P_{ST}$  in evolutionary and  
1071 conservation biology. *J Evol Biol* 24:1160–1168.
- 1072 Brown JB, Boley N, Eisman R, May GE, Stoiber MH, Duff MO, et al. 2014. Diversity and  
1073 dynamics of the *Drosophila* transcriptome. *Nature*. 7515:393–9.
- 1074 Cao W, Edery I. 2017. Mid-day siesta in natural populations of *D. melanogaster* from Africa  
1075 exhibits an altitudinal cline and is regulated by splicing of a thermosensitive intron in the  
1076 period clock gene. *BMC Evol. Biol.* 17: 32.
- 1077 Catalan A, Hutter S, Parsch J. 2012. Population and sex differences in *Drosophila melanogaster*  
1078 brain gene expression. *BMC Genomics* 13:1–12.
- 1079 Chakraborty M, VanKuren NW, Zhao R, Zhang X, Kalsow S, Emerson JJ. 2017. Hidden genetic  
1080 variation shapes the structure of functional elements in *Drosophila*. *Nat Genet* 50:20–25.
- 1081 Chen J, Nolte V, Schlötterer C. 2015. Temperature Stress Mediates Decanalization and  
1082 Dominance of Gene Expression in *Drosophila melanogaster*. *PLoS Genet* 11:e1004883.
- 1083 Comeron JM, Ratnappan R, Bailin S. 2012. The many landscapes of recombination in  
1084 *Drosophila melanogaster*. *PLoS Genet* 8:e1002905.
- 1085 Conte GL, Arnegard ME, Peichel CL, Schluter D. 2012. The probability of genetic parallelism  
1086 and convergence in natural populations. *Proc Royal Soc B* 279:5039–5047.
- 1087 Coolon JD, McManus CJ, Stevenson KR, Graveley BR, Wittkopp PJ. 2014. Tempo and mode of  
1088 regulatory evolution in *Drosophila*. *Genome Res* 24:797–808.



- 1089 Cowles CR, Hirschhorn JN, Altshuler D, Lander ES. 2002. Detection of regulatory variation in  
1090 mouse genes. *Nat Genet* 32:432–437
- 1091 Degner JF, Marioni JC, Pai AA, Pickrell JK, Nkadori E, Gilad Y, Pritchard JK. 2009. Effect of  
1092 read-mapping biases on detecting allele-specific expression from RNA-sequencing data.  
1093 *Bioinformatics* 25:3207–3212.
- 1094 Denby CM, Im JH, Yu RC, Pesce CG, Brem RB. 2012. Negative feedback confers mutational  
1095 robustness in yeast transcription factor regulation. *Proc Natl Acad Sci USA* 109:3874–3878.
- 1096 Deshpande, G., Calhoun, G., Schedl, P. 2005. *Drosophila argonaute-2* is required early in  
1097 embryogenesis for the assembly of centric/centromeric heterochromatin, nuclear division,  
1098 nuclear migration, and germ-cell formation. *Genes Dev.* 19:1680-1685.
- 1099 Dobin A, Davis CA, Schlesinger F, Drenkow J, Zaleski C, Jha S, Batut P, Chaisson M, Gingeras  
1100 TR. 2013. STAR: ultrafast universal RNA-seq aligner. *Bioinformatics* 29:15–21.
- 1101 Duneau D, Sun H, Revah J, San Miguel K, Kunerth HD, Caldas IV, Messer PW, Scott JG,  
1102 Buchon N. 2018. Signatures of insecticide selection in the genome of *Drosophila*  
1103 *melanogaster*. *G3 (Bethesda)* 8:3469–3480.
- 1104 Emerson JJ. 2019. Inferring compensatory evolution of cis- and trans-regulatory variation.  
1105 *Trends Genet* 35:1–3.
- 1106 Fabian DK, Kapun M, Nolte V, Kofler R, Schmidt PS, Schlötterer C, Flatt T. 2012. Genome-  
1107 wide patterns of latitudinal differentiation among populations of *Drosophila melanogaster*  
1108 from North America. *Mol Ecol* 21:4748–4769.
- 1109 Fear JM, Leon-Novelo LG, Morse AM, Gerken AR, Van Lehmann K, Tower J, Nuzhdin SV,  
1110 McIntyre LM. 2016. Buffering of genetic regulatory networks in *Drosophila melanogaster*.  
1111 *Genetics* 203:1177–1190.
- 1112 Fraser HB. 2019. Improving estimates of compensatory cis–trans regulatory divergence. *Trends*  
1113 *Genet* 35:3–5.
- 1114 Gamazon ER, Stranger BE. 2014. Genomics of alternative splicing: evolution, development and  
1115 pathophysiology *Hum Genet* 133:679-687
- 1116 Gibilisco L, Zhou Q, Mahajan S, Bachtrog D. 2016. Alternative splicing within and between  
1117 *Drosophila* species, sexes, tissues, and developmental stages. *PLoS Genet* 12: e1006464.
- 1118 Gibson JR, Chippindale AK, Rice AM. 2002. The X chromosome is a hot spot for sexually  
1119 antagonistic fitness variation. *Proc. Biol. Sci.* 269: 499–505.
- 1120 Glaser-Schmitt A, Zecic A, Parsch J. 2018. Gene regulatory variation in *Drosophila*  
1121 *melanogaster* renal tissue. *Genetics* 210:287–301.
- 1122 Good RT, Gramzow L, Battlay P, Sztal T, Batterham P, et al., 2014. The molecular evolution of  
1123 cytochrome P450 genes within and between *Drosophila* species. *Genome Biol. Evol.* 6:  
1124 1118–1134.

- 1125 Hanson D, Hu J, Hendry AP, Barrett RDH. 2017. Heritable gene expression differences between  
1126 lake and stream stickleback include both parallel and antiparallel components. *Heredity*  
1127 119:339–348.
- 1128 Hart JC, Ellis NA, Eisen MB, Miller CT. 2018. Convergent evolution of gene expression in two  
1129 high-toothed stickleback populations. *PLoS Genetics* 6:e1007443.
- 1130 Helfrich-Forster, C. 2018. Sleep in Insects. *Annu Rev Entomol* 63:69-86.
- 1131 Hoffmann AA, Hallas RJ, Dean JA, Schiffer M. 2003. Low potential for climatic stress  
1132 adaptation in a rainforest *Drosophila* species. *Science* 301:100–102.
- 1133 Hoffmann AA, Weeks AR. 2007. Climatic selection on genes and traits after a 100 year-old  
1134 invasion: a critical look at the temper-ate-tropical clines in *Drosophila melanogaster* from  
1135 eastern Australia. *Genetica* 129:133–147.
- 1136 Hsu SK, Jaksic AM, Nolte V, Barghi N, Mallard F, et al. 2019. A 24 h age difference causes  
1137 twice as much gene expression divergence as 100 generations of adaptation to a novel  
1138 environment. *Genes* 10:89.
- 1139 Huylmans AK, Parsch J. 2014. Population- and sex-biased gene expression in the excretion  
1140 organs of *Drosophila melanogaster*. *G3 (Bethesda)*. 4:2307–15.
- 1141 Izquierdo JI. 1991. How does *Drosophila melanogaster* overwinter? *Entomol. Exp. Appl.* 59:  
1142 51–58.
- 1143 Innocenti P, Morrow EH. 2010. The sexually antagonistic genes of *Drosophila melanogaster*.  
1144 *PLoS Biol.* 8: e1000335.
- 1145 James AC, Partridge L. 1995. Thermal evolution of rate of larval development in *Drosophila*  
1146 *melanogaster* in laboratory and field populations. *J. Evol. Biol.* 8: 315–330.
- 1147 Jones FC, Grabherr MG, Chan YF, Russell P, Mauceli E, et al. 2012. The genomic basis of  
1148 adaptive evolution in threespine sticklebacks. *Nature* 484:55–61.
- 1149 Josephs, EB., Lee. YW, Wood CW, Schoen DJ, Wright SI, et al. 2020. The Evolutionary Forces  
1150 Shaping Cis- and Trans-Regulation of Gene Expression within a Population of Outcrossing  
1151 Plants. *Molecular Biology and Evolution*, 37: 2386–2393
- 1152 Juneja P, Quinn A, Jiggins FM. 2016. Latitudinal clines in gene expression and cis-regulatory  
1153 element variation in *Drosophila melanogaster*. *BMC Genomics*:1–11.
- 1154 Kang J, Kim J, Choi K-W. 2011. Novel cytochrome P450, *cyp6a17*, is required for temperature  
1155 preference behavior in *Drosophila*. *PLoS ONE* 6:e29800.
- 1156 Kitano J, Ishikawa A, Kusakabe M. 2018. Parallel transcriptome evolution in stream threespine  
1157 sticklebacks. *Devel Growth Differ* 61:104–113.

- 1158 Kolaczowski B, Kern AD, Holloway AK, Begun DJ. 2011. Genomic differentiation between  
1159 temperate and tropical Australian populations of *Drosophila melanogaster*. *Genetics*  
1160 187:245–260.
- 1161 Kurmangaliyev YZ, Favorov AV, Osman NM, Lehmann K-V, Campo D, et al. 2015. Natural  
1162 variation of gene models in *Drosophila melanogaster*. *BMC Genomics* 16:198
- 1163 Lack JB, Lange JD, Tang AD, Corbett-Detig RB, Pool JE. 2016a. A thousand fly genomes: An  
1164 expanded *Drosophila* genome nexus. *Mol Biol Evol* 33:3308–3313.
- 1165 Lack JB, Monette MJ, Johanning EJ, Sprengelmeyer QD, Pool JE. 2016b. Decanalization of  
1166 wing development accompanied the evolution of large wings in high-altitude *Drosophila*.  
1167 *Proc Natl Acad Sci USA* 113:1014–1019.
- 1168 Lai Z, Kane NC, Zou Y, Rieseberg LH. 2008. Natural variation in gene expression between wild  
1169 and weedy populations of *Helianthus annuus*. *Genetics* 179:1881–1890.
- 1170 Landry CR, Lemos B, Rifkin SA, Dickinson WJ, Hartl DL. 2007. Genetic properties influencing  
1171 the evolvability of gene expression. *Science* 317:118–121.
- 1172 Lange JD, Pool JE. 2016. A haplotype method detects diverse scenarios of local adaptation from  
1173 genomic sequence variation. *Mol Ecol* 25:3081–3100.
- 1174 Lavington, E., and A. D. Kern, 2017 The effect of common inversion polymorphisms In(2L)t  
1175 and In(3R)Mo on patterns of transcriptional variation in *Drosophila melanogaster*. *G3*  
1176 (Bethesda)7: 3659–3668.
- 1177 Leder EH, McCairns RJS, Leinonen T, et al. 2015. The evolution and adaptive potential of  
1178 transcriptional variation in sticklebacks—signatures of selection and widespread heritability.  
1179 *Mol Biol and Evol* 32:674–689.
- 1180 Leinonen T, McCairns RJS, O'Hara RB, Merilä J. 2013.  $Q_{ST}-F_{ST}$  comparisons: evolutionary and  
1181 ecological insights from genomic heterogeneity. *Nat Rev Genet.* 14:179–190.
- 1182 Lemmon ZH, Bukowski R, Sun Q, Doebley JF. 2014. The role of cis regulatory evolution in  
1183 maize domestication. *PLoS Genet* 10:e1004745–15.
- 1184 Li B & Dewey Colin N. 2011. RSEM: accurate transcript quantification from RNA-Seq data  
1185 with or without a reference genome. *BMC Bioinform* 12:323
- 1186 Li H, Handsaker B, Wysoker A, Fennell T, Ruan J, et al. 2009. The Sequence alignment/map  
1187 (SAM) format and SAMtools. *Bioinformatics* 25:2078-2079.
- 1188 Li YI, Knowles DA, Humphrey J, Barbeira AN, Dickinson SP, et al. 2017. Annotation-free  
1189 quantification of RNA splicing using LeafCutter. *Nat Genet* 50:151–158.
- 1190 Liu, X., Y. I. Li, and J. K. Pritchard, 2019 Trans Effects on Gene Expression Can Drive  
1191 Omnigenic Inheritance. *Cell* 177: 1022–1034.e6.
- 1192 Losos JB. 2011. Convergence, adaptation, and constraint. *Evolution* 65:1827–1840.

- 1193 Machado HE, Bergland AO, O'Brien KR, Behrman EL, Schmidt PS, Petrov DA. 2016.  
1194 Comparative population genomics of latitudinal variation in *Drosophila simulans* and  
1195 *Drosophila melanogaster*. *Mol Ecol* 25:723–740.
- 1196 Mack KL, Campbell P, Nachman MW. 2016. Gene regulation and speciation in house mice.  
1197 *Genome Res* 26:451–461.
- 1198 Massouras A, Waszak SM, Albarca-Aguilera M, Hens K, Holcombe W, et al. 2012. Genomic  
1199 Variation and Its Impact on Gene Expression in *Drosophila melanogaster*. *PLoS Genet*  
1200 8:e1003055.
- 1201 Mateo L, Ullastres A, González J. 2014. A transposable element insertion confers xenobiotic  
1202 resistance in *Drosophila*. *PLoS Genet* 10:e1004560.
- 1203 McGirr JA, Martin CH. 2018. Parallel evolution of gene expression between trophic specialists  
1204 despite divergent genotypes and morphologies. *Evol Lett* 2:62–75.
- 1205 McManus CJ, Coolon JD, Duff MO, Eipper-Mains J, Graveley BR, Wittkopp PJ. 2010.  
1206 Regulatory divergence in *Drosophila* revealed by mRNA-seq. *Genome Res* 20:816–825.
- 1207 McManus CJ, Coolon JD, Eipper-Mains J, Wittkopp PJ, Graveley BR. 2014. Evolution of  
1208 splicing regulatory networks in *Drosophila*. *Genome Res* 24:786–796.
- 1209 Meiklejohn CD, Coolon JD, Hartl DL, Wittkopp PJ. 2014. The roles of cis- and trans-regulation  
1210 in the evolution of regulatory incompatibilities and sexually dimorphic gene expression.  
1211 *Genome Res* 24:84–95.
- 1212 Merilä J. 1997. Quantitative trait and allozyme divergence in the greenfinch (*Carduelis chloris*,  
1213 Aves: Fringillidae). *Biol J Linn Soc* 61:243–266.
- 1214 Metzger BP, Duvéau F, Yuan DC, Tryban S, Yang B, et al., 2016 Contrasting frequencies and  
1215 effects of cis- and trans-regulatory mutations affecting gene expression. *Mol. Biol. Evol.*  
1216 33:1131–1146.
- 1217 Müller L, Hutter S, Stamboliyska R, Saminadin-Peter SS, Stephanet W, et al. 2011. Population  
1218 transcriptomics of *Drosophila melanogaster* females. *BMC Genomics* 12: 81.
- 1219 Nagoshi E, Sugino K, Kula E, Okazaki E, Tachibana T, et al. 2010 Dissecting differential gene  
1220 expression within the circadian neuronal circuit of *Drosophila*. *Nat. Neurosci.* 13: 60-68.
- 1221 Nandamuri SP, Conte MA, Carleton KL. 2018. Multiple trans QTL and one cis-regulatory  
1222 deletion are associated with the differential expression of cone opsins in African cichlids.  
1223 *BMC Genomics.* 19:945.
- 1224 Nayak A, Berry B, Tassetto M, Kunitomi M, Acevedo A, et al. 2010. Cricket paralysis virus  
1225 antagonizes Argonaute 2 to modulate antiviral defense in *Drosophila*. *Nat. Struct. Mol. Biol.*  
1226 17: 547-554.
- 1227 Osada N, Miyagi R, Takahashi A. 2017. Cis- and trans-regulatory effects on gene expression in a  
1228 natural population of *Drosophila melanogaster*. *Genetics* 206:2139–2148.

- 1229 Pitches W, Pool JE, Dworkin I. 2012. Altitudinal clinal variation in wing size and shape in  
1230 african *Drosophila melanogaster*: one cline or many? *Evolution* 67:438–452.
- 1231 Pool JE, Braun DT, Lack JB. 2016. Parallel evolution of cold tolerance within *Drosophila*  
1232 *melanogaster*. *Mol Biol Evol* 34:349–360.
- 1233 Pool JE, Corbett-Detig RB, Sugino RP, Stevens KA, Cardeno CM, Crepeau MW, Duchen P,  
1234 Emerson JJ, Saelao P, Begun DJ, et al. 2012. Population genomics of sub-Saharan  
1235 *Drosophila melanogaster*: African diversity and non-African admixture. *PLoS Genet*  
1236 8:e1003080–24.
- 1237 Pool JE, Nielsen R. 2007. Population size changes reshape genomic patterns of diversity.  
1238 *Evolution* 61:3001–3006.
- 1239 Pool JE. 2015. The Mosaic Ancestry of the *Drosophila* Genetic Reference Panel and the *D.*  
1240 *melanogaster* reference genome reveals a network of epistatic fitness interactions. *Mol Biol*  
1241 *Evol* 32:3236–3251.
- 1242 Powell JR. 1997. Progress and prospects in evolutionary biology, The *Drosophila* model. New  
1243 York, NY: Oxford University Press.
- 1244 Qin, W., S. J. Neal, R. M. Robertson, J. T. Westwood, and V. K. Walker. 2005. Cold hardening  
1245 and transcriptional change in *Drosophila melanogaster*. *Insect Mol. Biol.* 14:607–613.
- 1246 Reinhardt JA, Kolaczowski B, Jones CD, Begun DJ, Kern AD. 2014. Parallel geographic  
1247 variation in *Drosophila melanogaster*. *Genetics* 197:361–373.
- 1248 Rosenblum EB, Parent CE, Brandt EE. 2014. The molecular basis of phenotypic convergence.  
1249 *Annu Rev Ecol Evol Syst* 45:203–226.
- 1250 Sackton TB, et al. 2019. Convergent regulatory evolution and loss of flight in paleognathous  
1251 birds. *Science* 364:74–78.
- 1252 Said I, Byrne A, Serrano V, Cardeno C, Vollmers C, and Corbett-Detig R. 2018. Linked genetic  
1253 variation and not genome structure causes widespread differential expression associated with  
1254 chromosomal inversions. *Proceedings of the National Academy of Sciences* 115:5492–5497.
- 1255 Schaefer B, Emerson JJ, Wang T-Y, Lu M-YJ, Hsieh L-C, Li W-H. 2013. Inheritance of gene  
1256 expression level and selective constraints on trans- and cis-regulatory changes in yeast. *Mol*  
1257 *Biol Evol* 30:2121–2133.
- 1258 Schluter D. 2000. The ecology of adaptive radiation. Oxford Univ. Press, New York.
- 1259 Schmidt PS, Paaby AB. 2008. Reproductive diapause and life-history clines in North American  
1260 populations of *Drosophila melanogaster*. *Evolution* 62:1204–1215.
- 1261 Singer-Sam J, LeBon JM, Dai A, Riggs AD. 1992. A sensitive, quantitative assay for  
1262 measurement of allele-specific transcripts differing by a single nucleotide. *PCR Methods*  
1263 *Appl.* 1: 160–163.

- 1264 Signor S, Nuzhdin S. 2018. Dynamic changes in gene expression and alternative splicing  
1265 mediate the response to acute alcohol exposure in *Drosophila melanogaster*. *Heredity*  
1266 121:342-360.
- 1267 Singh P, Börger C, More H, Sturmhuber C. 2017. The role of alternative splicing and differential  
1268 gene expression in cichlid adaptive radiation. *Genome Biol Evol* 9:2764–2781.
- 1269 Smith CCR, Tittes S, Mendieta JP, Collier-Zans E, Rowe HC, Rieseberg LH, Kane NC. 2018.  
1270 Genetics of alternative splicing evolution during sunflower domestication. *Proc Natl Acad*  
1271 *Sci USA* 115:6768-6773.
- 1272 Sokolowski, MB, Bauer SJ, Wai-Ping V, Rodriguez L, Wong JL, Kent C. 1986. Ecological  
1273 genetics and behavior of *Drosophila melanogaster* larvae in nature. *Animal Behavior*  
1274 34:403–408.
- 1275 Sprengelmeyer QD, Mansourian S, Lange JD, Matute DR, Cooper BS, Jirle EV, Stensmyr MC,  
1276 Pool JE. 2018. Discovery of *Drosophila melanogaster* from Wild African Environments and  
1277 Genomic Insights into Species History. *bioRxiv* 45:1153–13.
- 1278 St Pierre SE, Ponting L, Stefanicsik R, McQuilton P, the FlyBase Consortium. 2013. FlyBase  
1279 102—advanced approaches to interrogating FlyBase. *Nucleic Acids Res* 42:D780–D788.
- 1280 Stern DL. 2013. The genetic causes of convergent evolution. *Nat Rev Genet* 14:751–764.
- 1281 Stevenson KR, Coolon JD, Wittkopp PJ. 2013. Sources of bias in measures of allele-specific  
1282 expression derived from RNA-seq data aligned to a single reference genome. *BMC*  
1283 *Genomics* 14:536.
- 1284 Svetec N, Zhao L, Saelao P, Chiu JC, and Begun DJ. 2015. Evidence that natural selection  
1285 maintains genetic variation for sleep in *Drosophila melanogaster*. *BMC Evol. Biol.* 15: 41.
- 1286 Testa ND, Ghosh SM, and Shingleton AW. 2013. Sex-specific weight loss mediates sexual size  
1287 dimorphism in *Drosophila melanogaster*. *PLoS One* 8:e58936.
- 1288 Thurmond J, Goodman JL, Strelets VB, Attrill H, Gramates LS, et al. 2019. FlyBase 2.0: the  
1289 next generation. *Nucleic Acids Res.* 47:D759–D765. doi:10.1093/nar/gky1003.
- 1290 Venables JP, Tazi J, Juge F. 2011. Regulated functional alternative splicing in *Drosophila*.  
1291 *Nucleic Acids Res* 40:1–10.
- 1292 Verta JP, Jones FC. 2019. Predominance of cis-regulatory changes in parallel expression  
1293 divergence of sticklebacks. *eLife.* 8:e43785.
- 1294 Vicoso, B, and B. Charlesworth, 2006 Evolution on the X chromosome: unusual patterns and  
1295 processes. *Nat. Rev. Genet.* 7: 645–653.
- 1296 von Heckel, K., Stephan W., Hutter, S. 2016. Canalization of gene expression is a major  
1297 signature of regulatory cold adaptation in temperate *Drosophila melanogaster*. *BMC*  
1298 *Genomics*, 17:574.

- 1299 Wang D, Sung HM, Wang TY, Huang CJ, Yang P, *et al.* 2007. Expression evolution in yeast  
1300 genes of single-input modules is mainly due to changes in trans-acting factors. *Genome*  
1301 *Research* 17: 1161–1169. <https://doi.org/10.1101/gr.6328907>  
1302
- 1303 Wei Y, Reveall B, Reich J, Laursen WJ, Senger S, *et al.* 2014. TORC1 regulators Iml1/GATOR1  
1304 and GATOR2 control meiotic entry and oocyte development in *Drosophila*. *Proc. Natl.*  
1305 *Acad. Sci. U.S.A.* 111: E5670--E5677.
- 1306 Wittkopp PJ, Kalay G. 2011. Cis-regulatory elements: molecular mechanisms and evolutionary  
1307 processes underlying divergence. *Nat Rev Genet* 13:59–69.
- 1308 Wittkopp PJ, Haerum BK, Clark AG. 2004. Evolutionary changes in cis and trans gene  
1309 regulation. *Nature* 430:85–88.
- 1310 Wittkopp PJ, Haerum BK, Clark AG. 2008. Regulatory changes underlying expression  
1311 differences within and between *Drosophila* species. *Nat Genet* 40:346–350.
- 1312 Yan H, Yuan W, Velculescu VE, Vogelstein B, Kinzler KW. 2002. Allelic variation in human  
1313 gene expression. *Science* 297:1143
- 1314 Yu G, Wang L, Han Y, He Q. 2012. clusterProfiler: an R package for comparing biological  
1315 themes among gene clusters. *OMICS* 16:284-287.
- 1316 Yvert G, Brem RB, Whittle J, Akey JM, Foss E, *et al.* 2003. Trans-acting regulatory variation in  
1317 *Saccharomyces cerevisiae* and the role of transcription factors. *Nat. Genet.* 35:57–64.
- 1318 Zhao L, Begun DJ. 2017. Genomics of parallel adaptation at two timescales in *Drosophila*. *PLoS*  
1319 *Genet* 13:e1007016.
- 1320 Zhao L, Wit J, Svetec N, Begun DJ. 2015. Parallel gene expression differences between low and  
1321 high latitude populations of *Drosophila melanogaster* and *D. simulans*. *PLoS Genet*  
1322 11:e1005184.
- 1323 Zhang X, Cal AJ, Borevitz JO. 2011. Genetic architecture of regulatory variation in  
1324 *Arabidopsis thaliana*. *Genome Res.* 21:725–733.
- 1325 Zhang Y, Wang ZH, Liu Y, Chen Y, Sun N, *et al.* 2019. PINK1 Inhibits Local Protein Synthesis to  
1326 Limit Transmission of Deleterious Mitochondrial DNA Mutations. *Mol Cell*:1127-1137.
- 1327
